# Supplementary material
Source: publisher site journal article supplement (https://www.dovepress.com/article/214614)
Supplement: Supplementary file 1 [file get_supplementary_file.php]

**Supplementary Table 1** Genes in the yellow module.

| Accession number | Gene symbol | Gene Name                                                         |
|------------------|-------------|-------------------------------------------------------------------|
| NM_001105214     | ASH2L       | ASH2 like histone lysine methyltransferase complex subunit(ASH2L) |
| NM_004336        | BUB1        | BUB1 mitotic checkpoint serine                                    |
| NM_001262        | CDKN2C      | Cyclin dependent kinase inhibitor 2C(CDKN2C)                      |
| NM_001199803     | CENPO       | centromere protein O(CENPO)                                       |
| NM_001826        | CKS1B       | CDC28 protein kinase regulatory subunit 1B(CKS1B)                 |
| NM_001199741     | GADD45A     | growth arrest and DNA damage inducible alpha(GADD45A)             |
| NM_001145661     | GATA2       | GATA binding protein 2(GATA2)                                     |
| NM_005319        | HIST1H1C    | histone cluster 1 H1 family member c(HIST1H1C)                    |
| NM_021063        | HIST1H2BD   | histone cluster 1 H2B family member d(HIST1H2BD)                  |
| NM_003545        | HIST1H4E    | histone cluster 1 H4 family member e(HIST1H4E)                    |
| NM_001005464     | HIST2H3A    | histone cluster 2 H3 family member a(HIST2H3A)                    |
| NM_001142556     | HMMR        | hyaluronan mediated motility receptor(HMMR)                       |
| NM_182972        | IRF2BP2     | interferon regulatory factor 2 binding protein 2(IRF2BP2)         |
| NM_003740        | KCNK5       | potassium two pore domain channel subfamily K member 5(KCNK5)     |
| NM_006845        | KIF2C       | kinesin family member 2C(KIF2C)                                   |
| NM_001190818     | ORC1        | origin recognition complex subunit 1(ORC1)                        |
| NM_001003698     | RREB1       | ras responsive element binding protein 1(RREB1)                   |
| NM_001034        | RRM2        | ribonucleotide reductase regulatory subunit M2(RRM2)              |
| NM_014331        | SLC7A11     | solute carrier family 7 member 11(SLC7A11)                        |
| NM_016224        | SNX9        | sorting nexin 9(SNX9)                                             |
| NM_001134336     | STRIP2      | striatin interacting protein 2(STRIP2)                            |
| NM_001031685     | TP53BP2     | tumor protein p53 binding protein 2(TP53BP2)                      |
| NM_178014        | TUBB        | tubulin beta class I(TUBB)                                        |
| NM_000374        | UROD        | uroporphyrinogen decarboxylase(UROD)                              |
| NR_003502        | ZNRF2P1     | zinc and ring finger 2 pseudogene 1(ZNRF2P1)                      |
| NM_021058        | Hist1h2bj   | histone cluster 1 H2B family member j(HIST1H2BJ)                  |
| NR_028374        | SNORA80B    | small nucleolar RNA, H                                            |
| NR_037864        | AP4B1-AS1   | AP4B1 antisense RNA 1(AP4B1-AS1)                                  |
| NM_000601        | HGF         | Hepatocyte growth factor(HGF)                                     |
| NM_001200047     | NMNAT3      | nicotinamide nucleotide adenyltransferase 3(NMNAT3)               |
| NM_016002        | SCCPDH      | saccharopine dehydrogenase (putative)(SCCPDH)                     |
| NM_001003794     | MGLL        | monoglyceride lipase(MGLL)                                        |
| NM_018101        | CDCA8       | cell division cycle associated 8(CDCA8)                           |
| NM_018392        | ZGRF1       | zinc finger GRF-type containing 1(ZGRF1)                          |
| NM_003540        | Hist1h4f    | histone cluster 1 H4 family member f(HIST1H4F)                    |
| NM_000791        | DHFR        | dihydrofolate reductase(DHFR)                                     |
| NM_003534        | hist1h3g    | histone cluster 1 H3 family member g(HIST1H3G)                    |
| NM_001142548     | RAD54L      | RAD54-like ( <i>S. cerevisiae</i> )(RAD54L)                       |

|              |              |                                                                            |
|--------------|--------------|----------------------------------------------------------------------------|
| NM_003531    | Hist1h3c     | histone cluster 1 H3 family member c(HIST1H3C)                             |
| NM_003538    | Hist1h4a     | histone cluster 1 H4 family member a(HIST1H4A)                             |
| NM_001003790 | ERLIN2       | ER lipid raft associated 2(ERLIN2)                                         |
| NM_006343    | MERTK        | MER proto-oncogene, tyrosine kinase(MERTK)                                 |
| NM_003537    | Hist1h3b     | histone cluster 1 H3 family member b(HIST1H3B)                             |
| NM_003535    | HIST1H3J     | histone cluster 1 H3 family member j(HIST1H3J)                             |
| NM_021062    | HIST1H2BB    | histone cluster 1 H2B family member b(HIST1H2BB)                           |
| NM_001017420 | ESCO2        | establishment of sister chromatid cohesion<br>N-acetyltransferase 2(ESCO2) |
| NM_021064    | Hist1h2ag    | histone cluster 1 H2A family member g(HIST1H2AG)                           |
| NM_002491    | NDUFB3       | NADH:ubiquinone oxidoreductase subunit B3(NDUFB3)                          |
| NM_003539    | HIST1H4D     | histone cluster 1 H4 family member d(HIST1H4D)                             |
| NR_037177    | LOC100294145 | uncharacterized LOC100294145(LOC100294145)                                 |
| NM_001198557 | LMNB1        | lamin B1(LMNB1)                                                            |
| NM_021066    | Hist1h2aj    | histone cluster 1 H2A family member j(HIST1H2AJ)                           |
| NM_207418    | FAM72D       | family with sequence similarity 72 member D(FAM72D)                        |
| NM_016448    | DTL          | denticleless E3 ubiquitin protein ligase homolog(DTL)                      |
| NM_053002    | MED12L       | mediator complex subunit 12 like(MED12L)                                   |
| NM_002870    | RAB13        | RAB13, member RAS oncogene family(RAB13)                                   |
| NM_022836    | DCLRE1B      | DNA cross-link repair 1B(DCLRE1B)                                          |
| NM_003542    | hist1h4c     | histone cluster 1 H4 family member c(HIST1H4C)                             |
| NM_003544    | Hist1h4b     | histone cluster 1 H4 family member b(HIST1H4B)                             |
| NM_003546    | hist1h4l     | histone cluster 1 H4 family member l(HIST1H4L)                             |
| NM_004219    | PTTG1        | pituitary tumor-transforming 1(PTTG1)                                      |
| NM_001002800 | SMC4         | structural maintenance of chromosomes 4(SMC4)                              |
| NM_000249    | MLH1         | mutL homolog 1(MLH1)                                                       |
| NM_003856    | IL1RL1       | interleukin 1 receptor like 1(IL1RL1)                                      |
| NM_003126    | SPTA1        | spectrin alpha, erythrocytic 1(SPTA1)                                      |
| NM_000627    | LTBP1        | latent transforming growth factor beta binding protein 1(LTBP1)            |
| NR_034022    | LOC100131257 | zinc finger protein 655 pseudogene(LOC100131257)                           |
| NM_001195555 | CLINT1       | clathrin interactor 1(CLINT1)                                              |
| NM_032336    | GINS4        | GINS complex subunit 4(GINS4)                                              |
| NM_001190799 | PLK4         | polo like kinase 4(PLK4)                                                   |
| NM_003514    | hist1h2am    | histone cluster 1 H2A family member m(HIST1H2AM)                           |
| NM_003513    | Hist1h2ab    | histone cluster 1 H2A family member b(HIST1H2AB)                           |
| NM_003511    | hist1h2al    | histone cluster 1 H2A family member l(HIST1H2AL)                           |
| NM_003510    | Hist1h2ak    | histone cluster 1 H2A family member k(HIST1H2AK)                           |
| NM_018685    | ANLN         | anillin actin binding protein(ANLN)                                        |
| NM_012412    | H2AFV        | H2A histone family member V(H2AFV)                                         |
| NM_003519    | Hist1h2bl    | histone cluster 1 H2B family member l(HIST1H2BL)                           |
| NM_003518    | Hist1h2bg    | histone cluster 1 H2B family member g(HIST1H2BG)                           |
| NM_013296    | GPSM2        | G-protein signaling modulator 2(GPSM2)                                     |
| NM_001017415 | USP1         | ubiquitin specific peptidase 1(USP1)                                       |

|              |            |                                                                 |
|--------------|------------|-----------------------------------------------------------------|
| NM_006309    | LRRFIP2    | LRR binding FLII interacting protein 2(LRRFIP2)                 |
| NR_045217    | GS1-24F4.2 | uncharacterized LOC100652791(GS1-24F4.2)                        |
| NM_003530    | Hist1h3d   | histone cluster 1 H3 family member d(HIST1H3D)                  |
| NM_003525    | HIST1H2BI  | histone cluster 1 H2B family member i(HIST1H2BI)                |
| NM_031271    | TEX15      | testis expressed 15(TEX15)                                      |
| NM_003527    | hist1h2bo  | histone cluster 1 H2B family member o(HIST1H2BO)                |
| NM_003520    | Hist1h2bn  | histone cluster 1 H2B family member n(HIST1H2BN)                |
| NM_003523    | Hist1h2be  | histone cluster 1 H2B family member e(HIST1H2BE)                |
| NM_001135822 | FDPS       | farnesyl diphosphate synthase(FDPS)                             |
| NM_001111101 | CNRIP1     | cannabinoid receptor interacting protein 1(CNRIP1)              |
| NM_003318    | TTK        | TTK protein kinase(TTK)                                         |
| NM_001042426 | CENPA      | centromere protein A(CENPA)                                     |
| NM_003529    | HIST1H3A   | histone cluster 1 H3 family member a(HIST1H3A)                  |
| NM_001079809 | TMEM183B   | transmembrane protein 183B(TMEM183B)                            |
| NM_018098    | ECT2       | epithelial cell transforming 2(ECT2)                            |
| NM_021018    | Hist1h3f   | histone cluster 1 H3 family member f(HIST1H3F)                  |
| NM_001203247 | EZH2       | enhancer of zeste 2 polycomb repressive complex 2 subunit(EZH2) |
| NM_012089    | abcb10     | ATP binding cassette subfamily B member 10(ABCB10)              |
| NM_000324    | RHAG       | Rh-associated glycoprotein(RHAG)                                |
| NM_001099286 | MTRFR2     | mitochondrial fission regulator 2(MTRFR2)                       |
| NM_024629    | CENPU      | centromere protein U(CENPU)                                     |
| NM_018492    | PBK        | PDZ binding kinase(PBK)                                         |
| NM_001251989 | GMNN       | geminin, DNA replication inhibitor(GMNN)                        |
| NM_000740    | CHRM3      | cholinergic receptor muscarinic 3(CHRM3)                        |
| NR_003291    | ANKRD18DP  | ankyrin repeat domain 18D, pseudogene(ANKRD18DP)                |
| NM_001789    | CDC25A     | cell division cycle 25A(CDC25A)                                 |
| NM_001080539 | CCDC150    | coiled-coil domain containing 150(CCDC150)                      |
| NM_002263    | KIFC1      | kinesin family member C1(KIFC1)                                 |
| NM_003509    | Hist1h2ai  | histone cluster 1 H2A family member i(HIST1H2AI)                |
| NM_000851    | GSTM5      | glutathione S-transferase mu 5(GSTM5)                           |
| NM_203315    | BDH1       | 3-hydroxybutyrate dehydrogenase, type 1(BDH1)                   |
| NM_001128148 | TFRC       | transferrin receptor(TFRC)                                      |
| NM_002358    | MAD2L1     | MAD2 mitotic arrest deficient-like 1 (yeast)(MAD2L1)            |
| NM_175065    | HIST2H2AB  | histone cluster 2 H2A family member b(HIST2H2AB)                |
| NM_003607    | CDC42BPA   | CDC42 binding protein kinase alpha(CDC42BPA)                    |
| NM_022809    | CDC25C     | cell division cycle 25C(CDC25C)                                 |
| NM_001012507 | CENPW      | centromere protein W(CENPW)                                     |
| NM_001008393 | c4orf46    | chromosome 4 open reading frame 46(C4orf46)                     |
| NM_198503    | KCNT2      | potassium sodium-activated channel subfamily T member 2(KCNT2)  |
| NM_033211    | c5orf30    | chromosome 5 open reading frame 30(C5orf30)                     |
| NM_080743    | SRSF12     | serine and arginine rich splicing factor 12(SRSF12)             |
| NM_001142522 | FBXO5      | F-box protein 5(FBXO5)                                          |

|              |           |                                                         |
|--------------|-----------|---------------------------------------------------------|
| NM_001168388 | CITED2    | Cbp                                                     |
| NM_000720    | CACNA1D   | calcium voltage-gated channel subunit alpha1 D(CACNA1D) |
| NM_001201546 | SLC16A4   | solute carrier family 16 member 4(SLC16A4)              |
| NM_001114120 | DEPDC1    | DEP domain containing 1(DEPDC1)                         |
| NM_005733    | KIF20A    | kinesin family member 20A(KIF20A)                       |
| NM_001237    | CCNA2     | cyclin A2(CCNA2)                                        |
| NM_001143674 | MPC2      | mitochondrial pyruvate carrier 2(MPC2)                  |
| NM_002380    | MATN2     | matrilin 2(MATN2)                                       |
| NM_198468    | MMS22L    | MMS22 like, DNA repair protein(MMS22L)                  |
| NM_007027    | TOPBP1    | topoisomerase (DNA) II binding protein 1(TOPBP1)        |
| NM_004499    | HNRNPAB   | heterogeneous nuclear ribonucleoprotein A               |
| NR_024279    | FLJ37453  | uncharacterized LOC729614(FLJ37453)                     |
| NM_021052    | HIST1H2AE | histone cluster 1 H2A family member e(HIST1H2AE)        |
| NM_012081    | ELL2      | elongation factor for RNA polymerase II 2(ELL2)         |
| NM_000158    | GBE1      | 1,4-alpha-glucan branching enzyme 1(GBE1)               |
| NM_005742    | PDIA6     | protein disulfide isomerase family A member 6(PDIA6)    |
| NM_001190481 | CLSPN     | claspin(CLSPN)                                          |
| NM_020675    | SPC25     | SPC25, NDC80 kinetochore complex component(SPC25)       |
| NM_001100910 | FAM72B    | family with sequence similarity 72 member B(FAM72B)     |
| NM_012347    | FBXO9     | F-box protein 9(FBXO9)                                  |
| NM_002207    | ITGA9     | integrin subunit alpha 9(ITGA9)                         |
| NM_005915    | MCM6      | minichromosome maintenance complex component 6(MCM6)    |
| NM_005694    | COX17     | COX17, cytochrome c oxidase copper chaperone(COX17)     |
| BC096118     | Hist1h2bh | histone cluster 1 H2B family member h(HIST1H2BH)        |
| NM_033125    | SLC22A16  | solute carrier family 22 member 16(SLC22A16)            |
| NM_145269    | FAM92A    | family with sequence similarity 92 member A(FAM92A)     |
| NM_020242    | KIF15     | kinesin family member 15(KIF15)                         |
| NM_001166260 | TRIP13    | thyroid hormone receptor interactor 13(TRIP13)          |
| NM_018186    | c1orf112  | chromosome 1 open reading frame 112(C1orf112)           |
| NM_133331    | whsc1     | Wolf-Hirschhorn syndrome candidate 1(WHSC1)             |
| NM_199420    | POLQ      | DNA polymerase theta(POLQ)                              |
| NM_018189    | DPPA4     | developmental pluripotency associated 4(DPPA4)          |
| NM_005914    | MCM4      | minichromosome maintenance complex component 4(MCM4)    |
| NM_003035    | STIL      | SCL                                                     |
| NM_001006932 | RPS6KA2   | ribosomal protein S6 kinase A2(RPS6KA2)                 |
| NM_024686    | TTLL7     | tubulin tyrosine ligase like 7(TTLL7)                   |
| NM_178229    | IQGAP3    | IQ motif containing GTPase activating protein 3(IQGAP3) |
| NM_002214    | ITGB8     | integrin subunit beta 8(ITGB8)                          |

|              |           |                                                                |
|--------------|-----------|----------------------------------------------------------------|
| NM_016343    | CENPF     | centromere protein F(CENPF)                                    |
| NM_002916    | RFC4      | replication factor C subunit 4(RFC4)                           |
| NM_001077511 | TCF19     | transcription factor 19(TCF19)                                 |
| NM_145278    | GCSAML    | germinal center associated signaling and motility like(GCSAML) |
| NM_000181    | GUSB      | glucuronidase beta(GUSB)                                       |
| NM_001193493 | SLC1A4    | solute carrier family 1 member 4(SLC1A4)                       |
| NM_001012409 | SGO1      | shugoshin 1(SGO1)                                              |
| NM_000465    | BARD1     | BRCA1 associated RING domain 1(BARD1)                          |
| NM_001127181 | CENPL     | centromere protein L(CENPL)                                    |
| NM_006402    | LAMTOR5   | late endosomal                                                 |
| NM_001206846 | ASPM      | abnormal spindle microtubule assembly(ASPM)                    |
| NM_001130675 | CLGN      | calmegin(CLGN)                                                 |
| NM_001134420 | CDC7      | cell division cycle 7(CDC7)                                    |
| NM_020120    | UGGT1     | UDP-glucose glycoprotein glucosyltransferase 1(UGGT1)          |
| NM_004462    | FDFT1     | farnesyl-diphosphate farnesyltransferase 1(FDFT1)              |
| NM_001564    | ING2      | inhibitor of growth family member 2(ING2)                      |
| NM_033050    | SUCNR1    | succinate receptor 1(SUCNR1)                                   |
| NM_006816    | LMAN2     | lectin, mannose binding 2(LMAN2)                               |
| NM_006810    | PDIA5     | protein disulfide isomerase family A member 5(PDIA5)           |
| NM_001048249 | SMIM15    | small integral membrane protein 15(SMIM15)                     |
| NM_024037    | AUNIP     | aurora kinase A and ninein interacting protein(AUNIP)          |
| NR_033423    | DHFRP3    | dihydrofolate reductase pseudogene 3(DHFRP3)                   |
| NM_021908    | ST7       | suppression of tumorigenicity 7(ST7)                           |
| NM_182776    | MCM7      | minichromosome maintenance complex component 7(MCM7)           |
| NM_017760    | NCAPG2    | non-SMC condensin II complex subunit G2(NCAPG2)                |
| NM_022145    | CENPK     | centromere protein K(CENPK)                                    |
| NM_000589    | IL4       | interleukin 4(IL4)                                             |
| NM_001193557 | ENY2      | ENY2, transcription and export complex 2 subunit(ENY2)         |
| NM_007270    | FKBP9     | FK506 binding protein 9(FKBP9)                                 |
| NM_001870    | CPA3      | carboxypeptidase A3(CPA3)                                      |
| BC096123     | Hist1h2bf | histone cluster 1 H2B family member f(HIST1H2BF)               |
| NM_017898    |           | 2-Mar mitochondrial amidoxime reducing component 2(MARC2)      |
| NM_152515    | CKAP2L    | cytoskeleton associated protein 2 like(CKAP2L)                 |
| NM_001145208 | depdc1b   | DEP domain containing 1B(DEPDC1B)                              |
| NM_003575    | ZNF282    | zinc finger protein 282(ZNF282)                                |
| NM_018410    | HJURP     | Holliday junction recognition protein(HJURP)                   |
| NM_001042762 | FIGNL1    | fidgetin like 1(FIGNL1)                                        |
| NM_001130172 | MYB       | MYB proto-oncogene, transcription factor(MYB)                  |
| NM_022346    | NCAPG     | non-SMC condensin I complex subunit G(NCAPG)                   |

|              |           |                                                          |
|--------------|-----------|----------------------------------------------------------|
| NM_080596    | hist1h2ah | histone cluster 1 H2A family member h(HIST1H2AH)         |
| NM_198566    | C5orf34   | chromosome 5 open reading frame 34(C5orf34)              |
| NM_080593    | Hist1h2bk | histone cluster 1 H2B family member k(HIST1H2BK)         |
| NM_001018115 | FANCD2    | Fanconi anemia complementation group D2(FANCD2)          |
| NM_001005739 | VPS54     | VPS54, GARP complex subunit(VPS54)                       |
| NM_001432    | EREG      | epiregulin(EREG)                                         |
| NM_022778    | CEP85     | centrosomal protein 85(CEP85)                            |
| NM_003686    | EXO1      | exonuclease 1(EXO1)                                      |
| NM_004526    | MCM2      | minichromosome maintenance complex component 2(MCM2)     |
| NM_004528    | MGST3     | microsomal glutathione S-transferase 3(MGST3)            |
| NM_001130688 | HMGB2     | high mobility group box 2(HMGB2)                         |
| NM_001144999 | ITGAV     | integrin subunit alpha V(ITGAV)                          |
| NM_001123168 | FAM72A    | family with sequence similarity 72 member A(FAM72A)      |
| NM_001813    | CENPE     | centromere protein E(CENPE)                              |
| NM_030920    | ANP32E    | acidic nuclear phosphoprotein 32 family member E(ANP32E) |
| NM_005048    | PTH2R     | parathyroid hormone 2 receptor(PTH2R)                    |
| NM_018132    | CENPQ     | centromere protein Q(CENPQ)                              |
| NM_001127383 | CYBRD1    | cytochrome b reductase 1(CYBRD1)                         |
| NM_031942    | CDCA7     | cell division cycle associated 7(CDCA7)                  |
| NM_014875    | KIF14     | kinesin family member 14(KIF14)                          |
| NM_014049    | ACAD9     | acyl-CoA dehydrogenase family member 9(ACAD9)            |
| BC025376     | CHAC2     | ChaC cation transport regulator homolog 2(CHAC2)         |
| NM_001134656 | ZNF662    | zinc finger protein 662(ZNF662)                          |
| BC012827     | CDC20     | cell division cycle 20(CDC20)                            |
| NM_005431    | XRCC2     | X-ray repair cross complementing 2(XRCC2)                |
| NM_033296    | MRFAP1    | Morf4 family associated protein 1(MRFAP1)                |
| NM_014485    | HPGDS     | hematopoietic prostaglandin D synthase(HPGDS)            |
| NM_018725    | IL17RB    | interleukin 17 receptor B(IL17RB)                        |
| NM_020890    | KIAA1524  | KIAA1524(KIAA1524)                                       |
| NM_001136570 | fam47e    | family with sequence similarity 47 member E(FAM47E)      |
| NM_001123375 | hist2h3d  | histone cluster 2 H3 family member d(HIST2H3D)           |
| NM_001199199 | AK2       | adenylate kinase 2(AK2)                                  |
| NM_001162900 | TMEM217   | transmembrane protein 217(TMEM217)                       |
| NM_000097    | CPOX      | coproporphyrinogen oxidase(CPOX)                         |
| NM_152562    | CDCA2     | cell division cycle associated 2(CDCA2)                  |
| NM_022757    | CCDC14    | coiled-coil domain containing 14(CCDC14)                 |
| NM_022897    | RANBP17   | RAN binding protein 17(RANBP17)                          |
| NM_001160033 | SGO2      | shugoshin 2(SGO2)                                        |
| NM_001204182 | NEK2      | NIMA related kinase 2(NEK2)                              |
| NM_005321    | HIST1H1E  | histone cluster 1 H1 family member e(HIST1H1E)           |
| NM_031423    | NUF2      | NUF2, NDC80 kinetochore complex component(NUF2)          |
| NM_005517    | HMG2      | high mobility group nucleosomal binding domain           |

|              |           |                                                                                                |
|--------------|-----------|------------------------------------------------------------------------------------------------|
|              |           | 2(HMGN2)                                                                                       |
| NM_014176    | UBE2T     | ubiquitin conjugating enzyme E2 T(UBE2T)                                                       |
| NM_015341    | NCAPH     | non-SMC condensin I complex subunit H(NCAPH)                                                   |
| NM_005322    | HIST1H1B  | histone cluster 1 H1 family member b(HIST1H1B)                                                 |
| NM_004172    | SLC1A3    | solute carrier family 1 member 3(SLC1A3)                                                       |
| NM_001145319 | PLS1      | plastin 1(PLS1)                                                                                |
| NM_005218    | DEFB1     | defensin beta 1(DEFB1)                                                                         |
| NR_036501    | LINC00997 | long intergenic non-protein coding RNA 997(LINC00997)                                          |
| NM_005216    | DDOST     | dolichyl-diphosphooligosaccharide--protein<br>glycosyltransferase non-catalytic subunit(DDOST) |
| NM_005021    | ENPP3     | ectonucleotide pyrophosphatase                                                                 |
| NM_001005476 | PKP4      | plakophilin 4(PKP4)                                                                            |
| NM_001184988 | NDUFC1    | NADH:ubiquinone oxidoreductase subunit C1(NDUFC1)                                              |
| NM_031966    | CCNB1     | cyclin B1(CCNB1)                                                                               |
| NR_034134    | LINC01249 | long intergenic non-protein coding RNA<br>1249(LINC01249)                                      |

**Supplementary Table 2** Super-enhancer and super-enhancer-associated genes.

# Number of peaks stitched

| chromosome | start     | end       | #  | size_of_SE | H3K27Ac signal | Closet Gene |
|------------|-----------|-----------|----|------------|----------------|-------------|
| chr18      | 3584895   | 3627819   | 9  | 27294      | 205348.416     | FLJ35776    |
| chr2       | 87752833  | 87845197  | 11 | 54043      | 193964.4       | NCRNA00152  |
| chr2       | 112162711 | 112254789 | 11 | 54069      | 193584.7872    | LOC541471   |
| chr20      | 45933086  | 46022732  | 18 | 38779      | 165755.454     | ZMYND8      |
| chr16      | 85556307  | 85655033  | 12 | 51384      | 166698.851     | KIAA0182    |
| chr17      | 40417284  | 40476119  | 12 | 43073      | 156765.8575    | STAT5A      |
| chr4       | 10166375  | 10206865  | 7  | 25589      | 140848.514     | WDR1        |
| chr11      | 65215458  | 65276607  | 15 | 36812      | 142000.2078    | MALAT1      |
| chr1       | 144982173 | 145043585 | 6  | 35426      | 163478.744     | PDE4DIP     |
| chr10      | 74003490  | 74088372  | 17 | 34358      | 131719.8876    | DDIT4       |
| chr6       | 147176267 | 147238222 | 8  | 39378      | 125613.7625    | LOC729176   |
| chr6       | 43592191  | 43608659  | 2  | 11142      | 106574.3088    | MAD2L1BP    |
| chrX       | 65205408  | 65251756  | 6  | 36395      | 108940.974     | MIR223      |
| chr6       | 31700911  | 31709354  | 1  | 8444       | 103121.9577    | CLIC1       |
| chr20      | 30249019  | 30312368  | 18 | 46752      | 106724.0603    | BCL2L1      |
| chr6       | 7105653   | 7181303   | 11 | 41531      | 108656.095     | RREB1       |
| chr1       | 36837033  | 36878274  | 6  | 16504      | 98446.3911     | LSM10       |
| chr18      | 9866678   | 9930980   | 12 | 36046      | 104728.6674    | TXNDC2      |
| chr6       | 68590803  | 68609434  | 3  | 15179      | 92337.0991     | BAI3        |
| chr6       | 26282603  | 26337859  | 14 | 32884      | 99118.2128     | HIST1H4H    |
| chr1       | 12488053  | 12572179  | 13 | 42107      | 105123.8496    | SNORA59A    |
| chr17      | 56405255  | 56418628  | 1  | 13374      | 88265.8119     | MIR142      |
| chr19      | 52044324  | 52077248  | 5  | 18970      | 90886.702      | ZNF175      |

---

|       |           |           |    |       |            |              |
|-------|-----------|-----------|----|-------|------------|--------------|
| chrX  | 11358836  | 11456926  | 19 | 47960 | 95039.401  | AMELX        |
| chr6  | 28907272  | 28965455  | 10 | 26801 | 93540.8091 | ZNF311       |
| chr1  | 11845077  | 11868656  | 4  | 20774 | 87048.9522 | MTHFR        |
| chr2  | 158113089 | 158127195 | 2  | 11081 | 85294.7502 | GALNT5       |
| chr7  | 104649175 | 104657921 | 1  | 8747  | 84551.0804 | LOC100216545 |
| chr6  | 26020338  | 26035931  | 1  | 15594 | 84467.281  | HIST1H4B     |
| chr9  | 123627538 | 123641853 | 4  | 12953 | 84223.734  | PHF19        |
| chr7  | 12751801  | 12788319  | 4  | 26295 | 82483.2066 | ARL4A        |
| chr11 | 85844599  | 85914490  | 16 | 46192 | 88328.2458 | EED          |
| chr3  | 5017361   | 5066247   | 7  | 31070 | 86283.79   | BHLHE40      |
| chr3  | 45082598  | 45186417  | 20 | 39928 | 94641.4004 | CDCP1        |
| chr10 | 49663868  | 49715981  | 8  | 24591 | 85282.9245 | MAPK8        |
| chr9  | 132617654 | 132654924 | 7  | 25404 | 83555.613  | USP20        |
| chr7  | 106616676 | 106698255 | 16 | 34749 | 94786.6401 | PRKAR2B      |
| chr1  | 161498968 | 161565699 | 8  | 22026 | 95391.9645 | FCGR3A       |
| chr1  | 38462462  | 38482537  | 5  | 17013 | 78969.0275 | FHL3         |
| chr7  | 154996190 | 155000905 | 1  | 4716  | 75586.6365 | INSIG1       |
| chr1  | 45267402  | 45297550  | 4  | 8958  | 78110.4532 | BTBD19       |
| chr21 | 31006791  | 31032951  | 6  | 21779 | 79283.112  | NCRNA00258   |
| chr1  | 31228916  | 31256855  | 5  | 23060 | 78220.8183 | LAPTM5       |
| chr11 | 59303885  | 59334531  | 6  | 18980 | 76587.4186 | OR4D9        |
| chr8  | 130564240 | 130604476 | 9  | 28218 | 79550.5956 | GSDMC        |
| chr6  | 37137869  | 37178977  | 11 | 27632 | 78314.8508 | PIM1         |
| chr8  | 41644725  | 41687236  | 9  | 23518 | 78437.0461 | ANK1         |
| chr11 | 65170931  | 65198508  | 2  | 16150 | 75174.902  | NEAT1        |
| chr6  | 32934257  | 32942983  | 1  | 8727  | 73177.9812 | BRD2         |
| chr16 | 70437702  | 70473065  | 10 | 22556 | 74555.8129 | ST3GAL2      |
| chr22 | 19464660  | 19469047  | 1  | 4388  | 72135.8797 | UFD1L        |
| chr10 | 52070487  | 52096551  | 5  | 23687 | 77165.0784 | ASAH2        |
| chr20 | 326798    | 365790    | 12 | 26592 | 72599.2048 | TRIB3        |
| chr1  | 161580609 | 161618191 | 5  | 14994 | 80316.4922 | FCGR3B       |
| chr10 | 71068193  | 71095961  | 7  | 15515 | 73923.9696 | HK1          |
| chr8  | 37937339  | 37966322  | 4  | 17726 | 71330.0613 | ASH2L        |
| chr6  | 28676456  | 28785728  | 20 | 38070 | 84019.2408 | LOC401242    |
| chr7  | 150644932 | 150674880 | 6  | 18753 | 70210.0912 | KCNH2        |
| chr20 | 52194861  | 52241194  | 9  | 23041 | 70023.0629 | ZNF217       |
| chr18 | 3245029   | 3266545   | 4  | 12456 | 66972.8532 | MYL12B       |
| chr18 | 3643678   | 3666696   | 4  | 12751 | 66597.9794 | FLJ35776     |
| chr1  | 207798173 | 207826257 | 5  | 15014 | 67454.9596 | CR1L         |
| chr1  | 202125395 | 202136537 | 2  | 10267 | 62606.898  | PTPN7        |
| chr10 | 52302509  | 52364342  | 13 | 35189 | 72097.278  | SGMS1        |
| chr1  | 27830278  | 27901897  | 18 | 33644 | 70559.0388 | WASF2        |
| chr1  | 43388144  | 43433697  | 10 | 37145 | 67896.7465 | FLJ32224     |
| chr5  | 173265883 | 173323418 | 9  | 29606 | 68253.7705 | CPEB4        |

---



---

|       |           |           |    |       |            |              |
|-------|-----------|-----------|----|-------|------------|--------------|
| chr6  | 44008877  | 44046147  | 7  | 22516 | 66422.594  | C6orf223     |
| chr1  | 27008904  | 27050809  | 7  | 22151 | 66071.6135 | ARID1A       |
| chr16 | 89038124  | 89071299  | 8  | 20348 | 61277.5425 | CBFA2T3      |
| chr22 | 17080110  | 17089979  | 2  | 8006  | 63125.0847 | psiTPTE22    |
| chr7  | 106174640 | 106212690 | 5  | 14115 | 65503.075  | FLJ36031     |
| chr6  | 28300562  | 28325716  | 3  | 13419 | 62306.458  | ZKSCAN3      |
| chr5  | 118635498 | 118677011 | 6  | 19747 | 64083.6181 | TNFAIP8      |
| chr19 | 44256970  | 44289952  | 9  | 23331 | 60808.9134 | KCNN4        |
| chr9  | 130827373 | 130862517 | 7  | 21788 | 61610.9464 | SLC25A25     |
| chr11 | 3845805   | 3900251   | 8  | 29877 | 64115.6096 | STIM1        |
| chr3  | 177056336 | 177080066 | 5  | 13775 | 58869.384  | TBL1XR1      |
| chr19 | 45925989  | 45989691  | 9  | 20125 | 61950.195  | FOSB         |
| chr12 | 125388904 | 125426150 | 7  | 17501 | 60729.603  | UBC          |
| chr8  | 129046447 | 129079945 | 9  | 22980 | 60031.7658 | MIR1207      |
| chrX  | 154011615 | 154051049 | 6  | 18696 | 58283.452  | MPP1         |
| chr9  | 134145260 | 134155395 | 1  | 10136 | 60319.466  | FAM78A       |
| chr2  | 70311835  | 70317907  | 1  | 6073  | 55680.24   | PCBP1        |
| chr14 | 102172739 | 102200183 | 5  | 14465 | 56411.142  | NCRNA00239   |
| chr22 | 22894833  | 22903085  | 1  | 8253  | 59010.052  | PRAME        |
| chr7  | 152121125 | 152135897 | 2  | 8568  | 60574.0632 | MLL3         |
| chr1  | 47676900  | 47708166  | 4  | 14929 | 59943.1752 | TAL1         |
| chr18 | 805069    | 842668    | 5  | 17566 | 61139.7339 | YES1         |
| chr1  | 167585673 | 167612000 | 6  | 13144 | 58832.9469 | RCSD1        |
| chr6  | 15062162  | 15108543  | 7  | 16168 | 60276.7476 | JARID2       |
| chr6  | 26194341  | 26207503  | 1  | 13163 | 56330.7276 | HIST1H2BF    |
| chr10 | 5488274   | 5530685   | 8  | 22096 | 59260.8903 | NET1         |
| chr6  | 43877301  | 43941552  | 12 | 32291 | 65837.9997 | LOC100132354 |
| chr1  | 28827488  | 28852407  | 6  | 13968 | 56982.2773 | RCC1         |
| chr2  | 55314547  | 55370056  | 8  | 23297 | 61404.0558 | RTN4         |
| chr17 | 17723427  | 17755447  | 4  | 19078 | 55615.538  | SREBF1       |
| chr14 | 74178822  | 74255362  | 9  | 30486 | 58331.134  | C14orf43     |
| chr1  | 32392155  | 32423960  | 9  | 18714 | 57891.461  | PTP4A2       |
| chr3  | 195834769 | 195873620 | 7  | 15918 | 57612.1479 | LOC401109    |
| chr10 | 43885230  | 43931318  | 10 | 23519 | 58674.6328 | HNRNPF       |
| chr3  | 14444055  | 14457102  | 2  | 12163 | 54880.9008 | SLC6A6       |
| chrX  | 48628762  | 48662048  | 7  | 22014 | 55344.6322 | GATA1        |
| chr6  | 31624832  | 31635047  | 1  | 10216 | 56022.1245 | C6orf47      |
| chr6  | 14693553  | 14744733  | 7  | 19112 | 60730.188  | JARID2       |
| chr1  | 25592275  | 25612707  | 5  | 14967 | 57804.1712 | RHD          |
| chr1  | 26439828  | 26466218  | 6  | 13743 | 55904.576  | PDIK1L       |
| chr20 | 23115972  | 23142783  | 8  | 20994 | 53262.7326 | LOC200261    |
| chr17 | 25893122  | 25931172  | 6  | 20099 | 55788.91   | LGALS9       |
| chr1  | 25733770  | 25759448  | 6  | 17773 | 56840.8208 | RHCE         |
| chr17 | 32197364  | 32259574  | 9  | 22134 | 59230.141  | ACCN1        |

---

---

|       |           |           |    |       |            |              |
|-------|-----------|-----------|----|-------|------------|--------------|
| chr17 | 46696080  | 46725411  | 6  | 18254 | 53675.73   | MIR196A1     |
| chr1  | 29208490  | 29229626  | 6  | 11247 | 53271.1744 | EPB41        |
| chr15 | 93340339  | 93376304  | 7  | 15989 | 53782.061  | ASB9P1       |
| chrX  | 40006765  | 40037049  | 4  | 17712 | 51616.0496 | BCOR         |
| chr6  | 30580444  | 30587631  | 1  | 7188  | 50936.4251 | PPP1R10      |
| chr11 | 61600515  | 61639320  | 6  | 15714 | 53628.51   | FADS2        |
| chr1  | 16157863  | 16185093  | 4  | 11863 | 53073.993  | SPEN         |
| chr1  | 207192816 | 207200233 | 1  | 7418  | 50732.28   | C1orf116     |
| chr11 | 46257399  | 46278851  | 5  | 15035 | 51817.306  | CREB3L1      |
| chr19 | 49453304  | 49479978  | 6  | 14220 | 51216.7474 | FTL          |
| chr5  | 43063422  | 43082324  | 3  | 9657  | 50774.5524 | LOC100132356 |
| chr8  | 130689969 | 130723494 | 6  | 22171 | 53599.77   | GSDMC        |
| chr8  | 124160661 | 124201588 | 7  | 19363 | 53389.2715 | FAM83A       |
| chr5  | 139015207 | 139053115 | 8  | 21960 | 52282.7136 | CXXC5        |
| chr18 | 8993871   | 9023295   | 8  | 15336 | 53725.2816 | NDUFV2       |
| chr3  | 73159468  | 73160496  | 1  | 1029  | 48206.4152 | EBLN2        |
| chr1  | 16968670  | 16994036  | 4  | 6977  | 54174.1662 | MST1P2       |
| chr1  | 22094614  | 22121532  | 6  | 10955 | 50463.1746 | USP48        |
| chr22 | 19927739  | 19948733  | 3  | 8490  | 54107.8362 | COMT         |
| chr1  | 156714742 | 156743862 | 8  | 18889 | 50581.44   | HDGF         |
| chr10 | 17456583  | 17499857  | 6  | 19549 | 53218.3652 | ST8SIA6      |
| chr1  | 156074384 | 156100526 | 7  | 18022 | 49541.7042 | LMNA         |
| chr6  | 36829740  | 36858256  | 3  | 11338 | 52144.3576 | PPIL1        |
| chr3  | 50609507  | 50651737  | 7  | 24232 | 50042.55   | CISH         |
| chr19 | 13251311  | 13279109  | 4  | 11796 | 49035.672  | IER2         |
| chr5  | 89933242  | 89958144  | 5  | 21371 | 51133.7668 | GPR98        |
| chr2  | 97532432  | 97590803  | 11 | 27248 | 53543.7183 | FAM178B      |
| chr7  | 120627288 | 120649383 | 4  | 18137 | 53233.4835 | C7orf58      |
| chr7  | 137617046 | 137693938 | 10 | 29597 | 62628.534  | CREB3L2      |
| chr11 | 61730385  | 61741982  | 3  | 11386 | 48235.4021 | FTH1         |
| chr19 | 2034448   | 2062937   | 6  | 15141 | 47892.8579 | MKNK2        |
| chr1  | 90342900  | 90375127  | 5  | 21946 | 51376.2834 | LRRC8D       |
| chr1  | 223957692 | 223984375 | 6  | 15931 | 51722.3272 | TP53BP2      |
| chr19 | 29092320  | 29106684  | 3  | 12367 | 46661.454  | LOC148145    |
| chr12 | 31867130  | 31904385  | 9  | 20154 | 49936.602  | AMN1         |
| chr4  | 49089     | 59500     | 2  | 10354 | 51403.2714 | ZNF718       |
| chr17 | 27046094  | 27056603  | 1  | 10510 | 47315.7216 | SNORD4B      |
| chr7  | 75985959  | 76027627  | 8  | 17946 | 50684.9552 | YWHAG        |
| chr6  | 27095984  | 27112266  | 1  | 16283 | 48577.347  | HIST1H4I     |
| chr6  | 27801798  | 27808434  | 1  | 6637  | 46497.7884 | HIST1H2AK    |
| chr17 | 73772377  | 73783596  | 3  | 9809  | 46815.7651 | H3F3B        |
| chr1  | 226183294 | 226192583 | 1  | 9290  | 46805.4132 | C1orf55      |
| chr1  | 22212793  | 22263741  | 11 | 22112 | 52150.3728 | HSPG2        |
| chr16 | 9160461   | 9187995   | 6  | 14845 | 47363.9868 | C16orf72     |

---

---

|       |           |           |    |       |            |            |
|-------|-----------|-----------|----|-------|------------|------------|
| chr1  | 27097308  | 27118743  | 3  | 11393 | 48822.4995 | PIGV       |
| chr1  | 46150724  | 46155253  | 1  | 4530  | 45695.7984 | GPBP1L1    |
| chr6  | 41983821  | 42008013  | 5  | 10967 | 47728.3968 | CCND3      |
| chr18 | 3444764   | 3453538   | 2  | 8616  | 45606.3746 | TGIF1      |
| chr1  | 183993803 | 184023284 | 4  | 14301 | 49392.4674 | GLT25D2    |
| chrX  | 49001652  | 49030273  | 7  | 17095 | 45647.6329 | MAGIX      |
| chr8  | 23350545  | 23405735  | 10 | 21660 | 51790.296  | SLC25A37   |
| chr10 | 72409167  | 72460642  | 13 | 24159 | 52216.24   | ADAMTS14   |
| chr12 | 109080156 | 109096331 | 6  | 13860 | 46292.85   | CORO1C     |
| chr6  | 26519436  | 26578191  | 10 | 24101 | 53296.6605 | HMGN4      |
| chr12 | 54671415  | 54678486  | 1  | 7072  | 44985.702  | HNRNPA1P10 |
| chr16 | 81478727  | 81561323  | 9  | 21657 | 56512.1832 | CMIP       |
| chr22 | 18114680  | 18123517  | 2  | 6118  | 44785.916  | BCL2L13    |
| chr10 | 11913298  | 11944623  | 7  | 15334 | 46649.19   | C10orf47   |
| chr5  | 172196460 | 172235538 | 9  | 18502 | 48640.3866 | DUSP1      |
| chr11 | 33948126  | 33974919  | 7  | 16552 | 46927.9395 | LMO2       |
| chr9  | 132238885 | 132259619 | 5  | 14312 | 45633.4606 | C9orf50    |
| chr1  | 156627148 | 156634272 | 1  | 7125  | 43826.848  | NES        |
| chr1  | 117039944 | 117052548 | 4  | 9642  | 45486.5756 | CD58       |
| chr10 | 35657627  | 35704265  | 9  | 20029 | 48093.1056 | CCNY       |
| chr12 | 122234025 | 122245310 | 1  | 11286 | 44284.597  | LOC338799  |
| chr15 | 30916021  | 30921603  | 2  | 5526  | 43734.4118 | ARHGAP11B  |
| chr15 | 32905418  | 32910999  | 2  | 5568  | 43636.1647 | ARHGAP11A  |
| chrX  | 48793112  | 48820142  | 5  | 18112 | 45064.416  | OTUD5      |
| chr6  | 30683273  | 30691879  | 1  | 8607  | 44030.0172 | TUBB       |
| chr1  | 45187194  | 45209270  | 3  | 6889  | 44836.356  | KIF2C      |
| chr15 | 57602969  | 57627604  | 5  | 9212  | 44907.1415 | LOC283663  |
| chr5  | 95041547  | 95069561  | 4  | 15256 | 46553.6652 | RHOBTB3    |
| chr17 | 38219096  | 38271485  | 7  | 22023 | 47700.1845 | NR1D1      |
| chr17 | 46613969  | 46634327  | 4  | 12725 | 44368.2252 | HOXB2      |
| chr17 | 43222938  | 43240364  | 3  | 11564 | 44079.067  | HEXIM2     |
| chr17 | 27185039  | 27208128  | 5  | 15567 | 45192.0997 | MIR144     |
| chr9  | 100741857 | 100750459 | 1  | 8603  | 43075.3752 | ANP32B     |
| chr1  | 113240102 | 113250592 | 1  | 10491 | 43478.952  | RHOC       |
| chr5  | 180586353 | 180620665 | 8  | 20029 | 46098.172  | OR2V2      |
| chr3  | 43673379  | 43736551  | 10 | 21343 | 49255.2084 | ABHD5      |
| chr3  | 194859889 | 194926617 | 14 | 25478 | 49218.5728 | C3orf21    |
| chr1  | 246728130 | 246752011 | 3  | 20155 | 45741.6674 | CNST       |
| chr3  | 128121224 | 128146092 | 4  | 14685 | 42656.0804 | DNAJB8     |
| chr8  | 128901910 | 128941451 | 12 | 21365 | 46464.6291 | MIR1205    |
| chr19 | 39127109  | 39180359  | 11 | 23269 | 46987.8    | ACTN4      |
| chr1  | 151023572 | 151037972 | 4  | 13044 | 43459.2    | CDC42SE1   |
| chr3  | 49725613  | 49729526  | 1  | 3914  | 43638.1673 | RNF123     |
| chr4  | 40194566  | 40212893  | 4  | 17191 | 43559.6136 | RHOH       |

---

---

|       |           |           |    |       |            |                |
|-------|-----------|-----------|----|-------|------------|----------------|
| chr1  | 51432648  | 51446440  | 3  | 11906 | 43105.5168 | CDKN2C         |
| chr6  | 34191104  | 34216910  | 7  | 17166 | 44370.8364 | HMGA1          |
| chr5  | 53602381  | 53623922  | 5  | 19273 | 43540.8233 | ARL15          |
| chr19 | 47601862  | 47617835  | 2  | 10641 | 42207.0552 | ZC3H4          |
| chr2  | 157175859 | 157201169 | 3  | 12512 | 43533.2    | NR4A2          |
| chr7  | 20238735  | 20262626  | 4  | 11633 | 43123.255  | MACC1          |
| chr14 | 23474748  | 23505341  | 4  | 10875 | 43677.6261 | C14orf93       |
| chr7  | 120663254 | 120690463 | 7  | 18395 | 45961.4428 | C7orf58        |
| chr7  | 16299678  | 16311493  | 2  | 11720 | 41657.327  | ISPD           |
| chr6  | 7194963   | 7204421   | 1  | 9459  | 41629.387  | RREB1          |
| chr6  | 31653821  | 31672332  | 2  | 10762 | 44385.6758 | BAT5           |
| chr5  | 10288626  | 10320681  | 8  | 19699 | 44344.887  | CMBL           |
| chr6  | 2986645   | 2993392   | 1  | 6748  | 40626.3858 | DKFZP686I15217 |
| chr3  | 47006476  | 47031635  | 5  | 13264 | 42893.5791 | CCDC12         |
| chr3  | 9436100   | 9445704   | 2  | 9243  | 41421.0916 | SETD5          |
| chr1  | 28561510  | 28606088  | 5  | 14379 | 45046.069  | SESN2          |
| chrX  | 12964887  | 12996576  | 9  | 16324 | 41854.8312 | TMSB4X         |
| chr2  | 113397644 | 113486248 | 16 | 27100 | 50034.6788 | SLC20A1        |
| chrX  | 39951693  | 39993480  | 6  | 22202 | 41778.6426 | BCOR           |
| chr21 | 22517854  | 22574737  | 10 | 25417 | 46604.2419 | NCAM2          |
| chr6  | 168211660 | 168262114 | 9  | 22660 | 48097.7982 | MLLT4          |
| chr6  | 36997044  | 37029971  | 7  | 13572 | 44388.8887 | FGD2           |
| chr9  | 138838117 | 138853263 | 3  | 13957 | 40759.4006 | UBAC1          |
| chr9  | 100695069 | 100707730 | 1  | 12662 | 40927.9486 | HEMGN          |
| chr1  | 174965360 | 174973305 | 2  | 7453  | 40164.3585 | CACYBP         |
| chr19 | 41307651  | 41350388  | 6  | 14571 | 44557.5962 | EGLN2          |
| chr6  | 157922885 | 157943205 | 2  | 11322 | 42629.328  | MIR3692        |
| chr1  | 6659117   | 6676389   | 2  | 9613  | 40366.3912 | KLHL21         |
| chr11 | 9571001   | 9599590   | 5  | 13970 | 41299.6694 | WEE1           |
| chr7  | 149992476 | 150022454 | 5  | 16039 | 46639.7724 | ACTR3C         |
| chr6  | 12007679  | 12023911  | 3  | 9931  | 40946.8432 | HIVEP1         |
| chr11 | 62644553  | 62657951  | 4  | 9059  | 40374.873  | SLC3A2         |
| chr1  | 160508290 | 160520944 | 3  | 9052  | 40068.891  | SLAMF6         |
| chr1  | 68148200  | 68179986  | 6  | 15201 | 43438.7476 | GADD45A        |
| chr7  | 100025350 | 100035226 | 1  | 9877  | 39553.38   | MEPCE          |
| chr19 | 50372948  | 50393850  | 3  | 7826  | 39812.0394 | TBC1D17        |
| chr1  | 40842789  | 40866503  | 3  | 11249 | 42085.2358 | SMAP2          |
| chr11 | 65623610  | 65635245  | 2  | 6776  | 39081.965  | MUS81          |
| chr2  | 201970581 | 201997003 | 3  | 18468 | 39683.2018 | CFLAR          |
| chr1  | 149819256 | 149828095 | 1  | 8840  | 39436.0824 | HIST2H2BC      |
| chr1  | 235000873 | 235013526 | 3  | 12066 | 39788.6238 | NCRNA00184     |
| chr19 | 10393951  | 10416436  | 5  | 15053 | 39528.63   | ICAM5          |
| chr1  | 149808850 | 149818021 | 1  | 9172  | 39144.5793 | HIST2H3A       |
| chr5  | 131628093 | 131654872 | 8  | 18936 | 40987.9374 | SLC22A4        |

---

---

|       |           |           |    |       |            |              |
|-------|-----------|-----------|----|-------|------------|--------------|
| chr2  | 86412645  | 86444825  | 8  | 16996 | 41155.002  | MRPL35       |
| chr21 | 34912129  | 34917822  | 1  | 5694  | 38064.5366 | GART         |
| chr10 | 75749056  | 75790343  | 10 | 18652 | 42905.4504 | VCL          |
| chr17 | 77775993  | 77812912  | 8  | 18926 | 41319.7448 | CBX4         |
| chr2  | 15693824  | 15703889  | 1  | 10066 | 38148.363  | NBAS         |
| chr1  | 155656006 | 155669481 | 3  | 6869  | 38186.8025 | DAP3         |
| chr5  | 180668263 | 180676643 | 1  | 8381  | 37499.662  | GNB2L1       |
| chr13 | 91998658  | 92004819  | 1  | 6162  | 39870.2954 | MIR17        |
| chr10 | 75003145  | 75021762  | 3  | 10099 | 39572.2952 | MRPS16       |
| chr6  | 56909909  | 56913962  | 1  | 4054  | 36924.4512 | KIAA1586     |
| chr7  | 624324    | 651660    | 4  | 10696 | 37865.8272 | FLJ44511     |
| chr19 | 50860255  | 50882588  | 6  | 16099 | 38691.9225 | NAPSA        |
| chr17 | 45265245  | 45318220  | 8  | 15992 | 43360.0375 | MYL4         |
| chr1  | 167891154 | 167908793 | 3  | 11995 | 39297.9281 | BRP44        |
| chr6  | 105399235 | 105408197 | 1  | 8963  | 37275.6466 | LIN28B       |
| chr1  | 59346474  | 59370075  | 3  | 12075 | 39083.256  | LOC100131060 |
| chr2  | 178106412 | 178131053 | 5  | 14253 | 39861.7457 | MIR3128      |
| chr16 | 68105731  | 68128038  | 5  | 16452 | 38617.8784 | NFATC3       |
| chr21 | 38736834  | 38752968  | 3  | 12519 | 38398.92   | DYRK1A       |
| chr16 | 75045288  | 75122052  | 12 | 22118 | 43939.7136 | ZNRF1        |
| chr11 | 5262539   | 5277275   | 1  | 14737 | 39290.5968 | HBG1         |
| chr1  | 15101246  | 15112698  | 3  | 10708 | 37787.0192 | KAZ          |
| chr4  | 38662642  | 38677216  | 3  | 14317 | 37519.3056 | FLJ13197     |
| chr22 | 21978051  | 21986218  | 1  | 8168  | 40728.829  | YDJC         |
| chr17 | 76242969  | 76312934  | 14 | 22618 | 41846.0665 | LOC283999    |
| chr5  | 90673852  | 90680907  | 1  | 7056  | 36386.1625 | LOC100129716 |
| chr6  | 136608509 | 136612559 | 1  | 4051  | 36031.635  | BCLAF1       |
| chr1  | 113160000 | 113165120 | 1  | 5121  | 36277.248  | CAPZA1       |
| chr6  | 26120448  | 26128994  | 2  | 8431  | 36632.429  | HIST1H2AC    |
| chr2  | 62514486  | 62542038  | 8  | 14991 | 38975.0592 | B3GNT2       |
| chr1  | 110879512 | 110885193 | 1  | 5682  | 36194.7872 | RBM15        |
| chr15 | 91377837  | 91418238  | 6  | 13395 | 38639.5164 | FURIN        |
| chr19 | 12977852  | 13000353  | 3  | 10040 | 36514.6228 | DNASE2       |
| chr19 | 29012330  | 29056169  | 11 | 23118 | 39849.651  | LOC148145    |
| chr3  | 128200851 | 128224730 | 4  | 16117 | 36222.0551 | GATA2        |
| chr3  | 196063071 | 196068510 | 1  | 5440  | 35372.5365 | TM4SF19      |
| chr7  | 150704606 | 150737781 | 4  | 13822 | 40702.4075 | ATG9B        |
| chr11 | 12169410  | 12224366  | 8  | 17538 | 41722.5952 | MICAL2       |
| chr10 | 50368689  | 50396991  | 7  | 21546 | 40715.2572 | C10orf128    |
| chr6  | 11917911  | 11951613  | 5  | 12594 | 40560.357  | HIVEP1       |
| chr1  | 244996659 | 245001535 | 1  | 4877  | 35285.174  | FAM36A       |
| chr19 | 11195794  | 11207591  | 3  | 10216 | 35739.0115 | LDLR         |
| chr12 | 123847472 | 123875219 | 5  | 13555 | 36456.7833 | SETD8        |
| chr15 | 67356108  | 67391733  | 7  | 19382 | 39216      | SMAD3        |

---

---

|       |           |           |    |       |            |            |
|-------|-----------|-----------|----|-------|------------|------------|
| chr1  | 160960023 | 160992283 | 7  | 12012 | 37282.882  | F11R       |
| chr1  | 246303371 | 246357495 | 11 | 24298 | 43158.4776 | SMYD3      |
| chr2  | 127401013 | 127435321 | 8  | 17163 | 38054.4336 | GYPC       |
| chr1  | 234734428 | 234749680 | 2  | 14958 | 37286.5644 | IRF2BP2    |
| chr1  | 226109317 | 226120004 | 3  | 8575  | 35563.1299 | PYCR2      |
| chr7  | 158647999 | 158664392 | 4  | 13186 | 37098.9983 | WDR60      |
| chr6  | 56953782  | 56957419  | 1  | 3638  | 34741.7151 | ZNF451     |
| chr16 | 47491694  | 47503132  | 2  | 11384 | 35380.0216 | PHKB       |
| chr19 | 4368978   | 4390717   | 6  | 10631 | 35810.6547 | SH3GL1     |
| chr10 | 29094735  | 29129698  | 6  | 12560 | 37469.8471 | BAMBI      |
| chr12 | 57077627  | 57093513  | 5  | 9229  | 35538.5706 | PTGES3     |
| chr3  | 33941077  | 33957492  | 4  | 10939 | 36978.0705 | PDCD6IP    |
| chr1  | 155530010 | 155534734 | 1  | 4725  | 34676.9944 | ASH1L      |
| chr19 | 47285468  | 47292646  | 1  | 7179  | 34488.1366 | SLC1A5     |
| chr1  | 26945068  | 26948775  | 1  | 3708  | 34228.5845 | MIR1976    |
| chr6  | 31997747  | 32016635  | 4  | 9421  | 36856.1544 | STK19      |
| chr17 | 73829079  | 73856103  | 5  | 12922 | 36063.528  | UNC13D     |
| chr2  | 43395713  | 43423318  | 8  | 19961 | 37095.599  | ZFP36L2    |
| chr1  | 8930822   | 8941126   | 1  | 10305 | 35323.1424 | ENO1       |
| chr12 | 6713652   | 6754014   | 7  | 17157 | 35946.3972 | LPAR5      |
| chr7  | 139612630 | 139620148 | 2  | 7494  | 35304.528  | TBXAS1     |
| chr22 | 21354258  | 21358624  | 1  | 4367  | 35812.9882 | THAP7      |
| chr2  | 20094945  | 20103305  | 3  | 6743  | 34577.796  | TTC32      |
| chr7  | 23504662  | 23516640  | 2  | 10960 | 35123.0894 | IGF2BP3    |
| chr6  | 159270477 | 159276574 | 2  | 4970  | 34263.3109 | OSTCL      |
| chr22 | 21210863  | 21224216  | 2  | 11642 | 40383.4779 | SNAP29     |
| chr2  | 64864805  | 64882352  | 5  | 13954 | 36011.7081 | SERTAD2    |
| chr7  | 129841398 | 129848202 | 2  | 6600  | 34793.6148 | TMEM209    |
| chr8  | 27210876  | 27225054  | 4  | 9090  | 35028.1668 | PTK2B      |
| chr20 | 31208939  | 31238449  | 5  | 13391 | 36621.91   | C20orf203  |
| chr21 | 30671137  | 30690295  | 4  | 10633 | 35789.0598 | BACH1      |
| chr1  | 234858068 | 234864627 | 2  | 5343  | 33990.7057 | NCRNA00184 |
| chr5  | 162884541 | 162890656 | 1  | 6116  | 33175.7095 | HMMR       |
| chr8  | 67966738  | 67978898  | 2  | 7310  | 33999.36   | COPS5      |
| chr12 | 25086102  | 25105741  | 5  | 11799 | 34768.8856 | BCAT1      |
| chr18 | 9802118   | 9829896   | 5  | 12419 | 38461.4188 | TXNDC2     |
| chr22 | 40340249  | 40363635  | 4  | 13162 | 34903.605  | FAM83F     |
| chr1  | 17221824  | 17233223  | 2  | 5790  | 33848.1906 | CROCC      |
| chr17 | 47068012  | 47082132  | 3  | 12967 | 34853.808  | IGF2BP1    |
| chr1  | 207918947 | 207930725 | 1  | 11779 | 35981.79   | CD46       |
| chr20 | 37554720  | 37592161  | 8  | 13300 | 37040.3813 | DHX35      |
| chr5  | 67710275  | 67731207  | 4  | 11151 | 35843.9568 | PIK3R1     |
| chr1  | 65876300  | 65903880  | 4  | 13140 | 36463.518  | LEPROT     |
| chr16 | 23908356  | 23921923  | 4  | 13142 | 34305.5162 | PRKCB      |

---

---

|       |           |           |    |       |            |           |
|-------|-----------|-----------|----|-------|------------|-----------|
| chr19 | 16997023  | 17009003  | 5  | 8977  | 33214.55   | F2RL3     |
| chr6  | 129980614 | 130032589 | 14 | 26580 | 39189.15   | ARHGAP18  |
| chr10 | 73390871  | 73419840  | 3  | 13771 | 37737.9163 | C10orf105 |
| chr7  | 32697509  | 32721465  | 4  | 10598 | 37388.1292 | DPY19L1P1 |
| chr1  | 154971361 | 154990749 | 3  | 11929 | 33890.224  | ZBTB7B    |
| chr11 | 118954839 | 118961457 | 1  | 6619  | 33013.2312 | HMBS      |
| chr19 | 41255025  | 41261084  | 2  | 4739  | 32602.8731 | SNRPA     |
| chr10 | 80935912  | 80949497  | 3  | 8012  | 34096.9915 | ZMIZ1     |
| chr12 | 120719983 | 120731827 | 3  | 3763  | 33093.3204 | SIRT4     |
| chr2  | 100894913 | 100910435 | 5  | 10280 | 34075.4466 | LONRF2    |
| chr15 | 34937886  | 34958983  | 5  | 18518 | 35221.4415 | GOLGA8B   |
| chr17 | 39821715  | 39847875  | 4  | 9747  | 34065.552  | EIF1      |
| chr1  | 52340279  | 52345851  | 1  | 5573  | 32856.4124 | NRD1      |
| chr11 | 63972917  | 63977104  | 1  | 4188  | 32216.0341 | FERMT3    |
| chr16 | 85079144  | 85090259  | 2  | 8188  | 34136.388  | KIAA0513  |
| chr1  | 45476112  | 45481112  | 1  | 5001  | 33041.5    | UROD      |
| chr2  | 85750241  | 85768173  | 3  | 6049  | 33525.6672 | MAT2A     |
| chr19 | 35787604  | 35810506  | 8  | 14621 | 34327.8078 | MAG       |
| chr1  | 117220759 | 117240061 | 7  | 13021 | 35345.8224 | MIR320B1  |
| chr2  | 145262722 | 145282807 | 4  | 17399 | 34036.041  | ZEB2      |
| chr6  | 138180976 | 138189191 | 1  | 8216  | 33167.241  | TNFAIP3   |
| chr6  | 34623822  | 34647977  | 8  | 12738 | 35092.384  | C6orf106  |
| chr15 | 64183148  | 64191911  | 2  | 8490  | 32840.2188 | HERC1     |
| chr21 | 16108277  | 16137333  | 5  | 17990 | 35724.352  | SAMSN1    |
| chr12 | 57914573  | 57918797  | 1  | 4225  | 31699.008  | MBD6      |
| chr2  | 26565216  | 26580902  | 6  | 12611 | 33401.7684 | GPR113    |
| chr1  | 46750211  | 46774967  | 6  | 12992 | 34982.7036 | LRRC41    |
| chr3  | 4854937   | 4874008   | 4  | 12875 | 35359.5411 | EGOT      |
| chr5  | 137908860 | 137912472 | 1  | 3613  | 31770.4296 | HSPA9     |
| chr1  | 24102533  | 24122213  | 4  | 9347  | 34073.952  | LYPLA2    |
| chr5  | 10248280  | 10252597  | 1  | 4318  | 32080.4904 | CCT5      |
| chr11 | 33888345  | 33934978  | 7  | 16504 | 37772.73   | LMO2      |
| chr16 | 90059773  | 90063540  | 1  | 3768  | 31327.8788 | DBNDD1    |
| chr12 | 93764482  | 93794469  | 5  | 12951 | 35360.6704 | NUDT4P1   |
| chr19 | 42771562  | 42788511  | 2  | 9504  | 32433.6064 | CIC       |
| chr9  | 126058510 | 126108380 | 9  | 16273 | 37327.695  | CRB2      |
| chr1  | 204474681 | 204488675 | 2  | 7007  | 33218.9572 | MDM4      |
| chr13 | 97901262  | 97914924  | 2  | 9707  | 32709.5604 | MBNL2     |
| chr17 | 58463403  | 58471182  | 1  | 7780  | 32114.0457 | USP32     |
| chr9  | 114932464 | 114957866 | 6  | 11712 | 33703.3736 | SUSD1     |
| chr6  | 147515524 | 147544610 | 5  | 16278 | 36534.9246 | LOC729178 |
| chr10 | 50505793  | 50510253  | 1  | 4461  | 31701.68   | C10orf71  |
| chr6  | 17701999  | 17716191  | 3  | 9507  | 32772.1664 | NUP153    |
| chr12 | 111834450 | 111853365 | 4  | 13491 | 33105.033  | SH2B3     |

---

---

|       |           |           |    |       |            |              |
|-------|-----------|-----------|----|-------|------------|--------------|
| chr6  | 39173560  | 39198078  | 3  | 12885 | 34592.4462 | KCNK5        |
| chr2  | 12415549  | 12429632  | 3  | 12679 | 33233.0634 | TRIB2        |
| chr12 | 109020862 | 109035199 | 2  | 7658  | 32930.6553 | SELPLG       |
| chr7  | 139023856 | 139028150 | 1  | 4295  | 32013.4876 | C7orf55      |
| chr22 | 22219264  | 22225051  | 2  | 5604  | 34283.3454 | MAPK1        |
| chr12 | 46764108  | 46781415  | 4  | 10258 | 32743.1133 | SLC38A2      |
| chr6  | 43737094  | 43744292  | 1  | 7199  | 31741.0206 | VEGFA        |
| chr17 | 79815361  | 79831336  | 5  | 11220 | 32320.62   | P4HB         |
| chr1  | 65719228  | 65760474  | 6  | 13053 | 36849.1764 | DNAJC6       |
| chr19 | 19475118  | 19521781  | 13 | 19023 | 35076.5771 | GATAD2A      |
| chr1  | 193023348 | 193040890 | 4  | 11413 | 33980.6082 | TROVE2       |
| chr10 | 106087545 | 106110175 | 5  | 17063 | 32245.487  | ITPRIP       |
| chr6  | 119624142 | 119646692 | 5  | 15436 | 33678.425  | MAN1A1       |
| chr6  | 27857151  | 27865013  | 1  | 7863  | 31806.5072 | HIST1H2AM    |
| chr1  | 33279051  | 33285082  | 1  | 6032  | 31144.084  | S100PBP      |
| chr13 | 111596484 | 111634776 | 8  | 16772 | 33302.5524 | ANKRD10      |
| chr17 | 25658936  | 25682129  | 4  | 13024 | 33576.5061 | WSB1         |
| chr1  | 21933189  | 21967366  | 9  | 17923 | 34843.4515 | RAP1GAP      |
| chr19 | 13206375  | 13215980  | 1  | 9606  | 31158.62   | LYL1         |
| chr16 | 2800544   | 2806328   | 2  | 5755  | 30959.4384 | LOC100128788 |
| chr6  | 31936510  | 31941953  | 1  | 5444  | 31293.4399 | STK19        |
| chr10 | 63510496  | 63555766  | 7  | 20121 | 39751.587  | C10orf107    |
| chr16 | 20751159  | 20779480  | 6  | 16404 | 33200.7083 | ACSM3        |
| chr6  | 13660859  | 13682348  | 4  | 16357 | 34590.8433 | RANBP9       |
| chr17 | 38972857  | 38986734  | 2  | 10844 | 31779.7177 | KRT10        |
| chr7  | 14019471  | 14044537  | 3  | 16113 | 33307.7008 | ETV1         |
| chr4  | 68563035  | 68593496  | 4  | 12076 | 34247.3023 | LOC550112    |
| chr22 | 21270378  | 21276091  | 1  | 5714  | 33043.4207 | CRKL         |
| chr20 | 54984429  | 55024074  | 7  | 19592 | 34090.7355 | CASS4        |
| chr19 | 49630759  | 49665510  | 6  | 13304 | 33395.711  | HRC          |
| chr17 | 27459147  | 27508232  | 9  | 17175 | 35287.2065 | MYO18A       |
| chr11 | 61563412  | 61585997  | 5  | 12990 | 32669.2025 | MIR1908      |
| chr17 | 74634657  | 74640749  | 1  | 6093  | 30862.072  | ST6GALNAC1   |
| chr6  | 2848750   | 2860346   | 2  | 9372  | 31745.2096 | SERPINB1     |
| chr6  | 30839713  | 30854650  | 3  | 10226 | 32308.731  | DDR1         |
| chr7  | 26226800  | 26254468  | 4  | 9757  | 33478.28   | HNRNPA2B1    |
| chr1  | 154944590 | 154949676 | 1  | 5087  | 30624.3318 | CKS1B        |
| chr2  | 24230922  | 24239386  | 2  | 6609  | 30597.36   | MFSD2B       |
| chr1  | 109915636 | 109937956 | 4  | 11940 | 33814.8    | SORT1        |
| chr10 | 22954741  | 23009971  | 10 | 19569 | 37236.066  | PIP4K2A      |
| chr3  | 13025173  | 13050253  | 4  | 8496  | 33863.016  | IQSEC1       |
| chr6  | 31506920  | 31511453  | 1  | 4534  | 30413.2569 | SNORD84      |
| chr17 | 36856942  | 36888546  | 3  | 11127 | 32729.1024 | MLLT6        |
| chr2  | 192698005 | 192732266 | 6  | 18918 | 32887.1339 | SDPR         |

---



---

|       |           |           |    |       |            |              |
|-------|-----------|-----------|----|-------|------------|--------------|
| chr11 | 85763515  | 85782682  | 4  | 14376 | 32123.892  | PICALM       |
| chr19 | 12888573  | 12907797  | 4  | 14026 | 31588.8768 | JUNB         |
| chr1  | 230254877 | 230297745 | 8  | 17904 | 37299.4468 | GALNT2       |
| chr4  | 170525265 | 170548970 | 7  | 14857 | 32255.3935 | NEK1         |
| chr1  | 149855045 | 149861172 | 1  | 6128  | 30142.3892 | HIST2H2BE    |
| chr3  | 141069903 | 141089421 | 3  | 7527  | 32423.3016 | ZBTB38       |
| chr1  | 20509945  | 20516311  | 1  | 6367  | 30564.4392 | UBXN10       |
| chr12 | 98896460  | 98928250  | 4  | 8671  | 32165.122  | LOC100128191 |
| chr20 | 623323    | 654171    | 6  | 10145 | 31489.6384 | SRXN1        |
| chr1  | 109621848 | 109647374 | 5  | 9983  | 32369.5206 | TMEM167B     |
| chr2  | 145337058 | 145355035 | 2  | 8097  | 31565.8143 | ZEB2         |
| chr11 | 75243991  | 75251035  | 1  | 7045  | 30236.37   | GDPD5        |
| chr17 | 7738067   | 7748928   | 2  | 10369 | 29648.3578 | KDM6B        |
| chr17 | 72863486  | 72874446  | 2  | 9610  | 30370.16   | FDXR         |
| chr9  | 73025634  | 73036683  | 2  | 8252  | 29957.1537 | KLF9         |
| chr22 | 21994940  | 21998750  | 1  | 3811  | 31525.845  | SDF2L1       |
| chrX  | 153231138 | 153240415 | 1  | 9278  | 29563.9436 | HCFC1        |
| chr17 | 7482139   | 7492084   | 2  | 9715  | 29725.605  | MPDU1        |
| chr11 | 97833097  | 97845718  | 2  | 7180  | 30315.642  |              |
| chr1  | 16274669  | 16283224  | 2  | 7663  | 30354.851  | ZBTB17       |
| chr3  | 5469176   | 5484612   | 4  | 8097  | 31776.5496 | EDEM1        |
| chr15 | 66942040  | 66973374  | 10 | 12645 | 32314.7542 | SMAD6        |
| chr1  | 145436511 | 145442596 | 1  | 6086  | 29884.0435 | TXNIP        |
| chr12 | 122500452 | 122530708 | 7  | 14375 | 31799.056  | MLXIP        |
| chr6  | 160389123 | 160421488 | 7  | 19333 | 34494.617  | IGF2R        |
| chr16 | 29796128  | 29822133  | 5  | 11117 | 31049.97   | KIF22        |
| chr16 | 81648070  | 81686585  | 6  | 14548 | 34274.4985 | CMIP         |
| chr6  | 33238660  | 33245964  | 1  | 7305  | 29713.4024 | RPS18        |
| chr7  | 22704045  | 22758516  | 10 | 20483 | 35199.1602 | IL6          |
| chr1  | 159879826 | 159896250 | 2  | 7287  | 30307.2072 | TAGLN2       |
| chr1  | 245024562 | 245030215 | 1  | 5654  | 29326.6334 | HNRNPU       |
| chr5  | 179038625 | 179062304 | 4  | 8585  | 31078.6875 | HNRNPH1      |
| chr22 | 19839615  | 19844173  | 1  | 4559  | 30317.9928 | C22orf29     |
| chr1  | 52866063  | 52871784  | 1  | 5722  | 29169.0906 | ORC1         |
| chr17 | 57693348  | 57699605  | 1  | 6258  | 28981.7983 | CLTC         |
| chr11 | 46004076  | 46019969  | 4  | 8014  | 30621.0431 | GYLTL1B      |
| chr6  | 74224888  | 74234497  | 3  | 8309  | 29424.6798 | EEF1A1       |
| chr6  | 28833987  | 28866633  | 5  | 11268 | 33034.4874 | LOC401242    |
| chr11 | 10916159  | 10922917  | 2  | 4449  | 28775.564  | LOC729013    |
| chr10 | 73596244  | 73649553  | 8  | 13986 | 35231.9181 | PSAP         |
| chr14 | 35824975  | 35860861  | 5  | 8713  | 30076.0566 | NFKBIA       |
| chr1  | 207221192 | 207227274 | 1  | 6083  | 29059.796  | YOD1         |
| chr19 | 47728520  | 47733676  | 1  | 5157  | 28652.9232 | MIR3191      |
| chr11 | 129870995 | 129878037 | 2  | 6607  | 28778.5414 | PRDM10       |

---

---

|       |           |           |   |       |            |            |
|-------|-----------|-----------|---|-------|------------|------------|
| chr14 | 55218429  | 55240879  | 5 | 10079 | 29937.075  | SAMD4A     |
| chr1  | 155939443 | 155954377 | 2 | 12088 | 29985.9786 | ARHGEF2    |
| chr19 | 48824413  | 48837934  | 3 | 8277  | 29244.5709 | EMP3       |
| chr19 | 46004528  | 46019977  | 3 | 9847  | 29604.9187 | VASP       |
| chr6  | 33167053  | 33170992  | 1 | 3940  | 28405.7046 | SLC39A7    |
| chr7  | 106413593 | 106419281 | 1 | 5689  | 29265.3288 | PIK3CG     |
| chr5  | 137874068 | 137881389 | 2 | 7270  | 28636.0915 | ETF1       |
| chr16 | 15656678  | 15687827  | 7 | 12178 | 30619.467  | KIAA0430   |
| chr11 | 96050467  | 96077004  | 8 | 18459 | 32154.8829 | MIR1260B   |
| chr6  | 161625448 | 161651101 | 4 | 8571  | 33613.1259 | NCRNA00241 |
| chr6  | 32141902  | 32148482  | 1 | 6581  | 29195.46   | AGPAT1     |
| chr1  | 23693196  | 23719337  | 4 | 8282  | 31016.2965 | ZNF436     |
| chr3  | 138580999 | 138610348 | 5 | 7734  | 29668.9041 | FOXL2      |
| chr7  | 102611312 | 102634635 | 5 | 10995 | 30996.267  | LRRC17     |
| chr15 | 93442901  | 93461915  | 2 | 10060 | 30314.0202 | MIR3175    |
| chr8  | 1693136   | 1709421   | 2 | 9023  | 29519.8195 | CLN8       |
| chr6  | 31801366  | 31806603  | 1 | 5238  | 28539.0315 | SNORD52    |
| chr8  | 2569275   | 2594021   | 4 | 16728 | 30519.2418 | MYOM2      |
| chr22 | 38573671  | 38578522  | 2 | 4539  | 27551.7396 | PLA2G6     |
| chr1  | 206823123 | 206860787 | 5 | 14235 | 34884.3968 | MAPKAPK2   |
| chr7  | 86758005  | 86784222  | 3 | 7159  | 32260.0185 | DMTF1      |
| chr7  | 129764188 | 129793133 | 5 | 15243 | 33362.007  | TMEM209    |
| chr7  | 120708976 | 120724282 | 3 | 14582 | 31054.3434 | C7orf58    |
| chr1  | 11967553  | 11971257  | 1 | 3705  | 27793.3344 | KIAA2013   |
| chr10 | 13432421  | 13460519  | 3 | 7196  | 29972.1366 | SEPHS1     |
| chr6  | 134260642 | 134294746 | 4 | 11931 | 31211.9808 | TBPL1      |
| chr10 | 3844462   | 3854220   | 2 | 8488  | 28639.73   | KLF6       |
| chr6  | 3021437   | 3027902   | 2 | 6288  | 28136.3265 | LOC401233  |
| chr3  | 156875958 | 156894409 | 2 | 6330  | 29266.9762 | CCNL1      |
| chr7  | 99003879  | 99008061  | 1 | 4183  | 27760.5342 | PDAP1      |
| chr12 | 62641706  | 62657985  | 3 | 11607 | 29243.5956 | USP15      |
| chr19 | 18483230  | 18487443  | 1 | 4214  | 27262.323  | GDF15      |
| chr6  | 159289406 | 159292226 | 1 | 2821  | 27181.416  | OSTCL      |
| chr6  | 49600289  | 49616578  | 3 | 9953  | 30222.6106 | RHAG       |
| chr7  | 35031313  | 35055844  | 5 | 10237 | 31470.8199 | DPY19L1    |
| chr5  | 42982266  | 43010260  | 3 | 8942  | 31815.181  | LOC648987  |
| chr22 | 22291245  | 22304088  | 2 | 7088  | 34713.3447 | PPM1F      |
| chr19 | 55516526  | 55554857  | 6 | 11751 | 29330.8812 | GP6        |
| chr19 | 40772984  | 40793136  | 4 | 13007 | 29222.4152 | MIR641     |
| chr11 | 62620229  | 62626215  | 1 | 5987  | 27732.5394 | SNORD25    |
| chr14 | 31492939  | 31530136  | 9 | 17133 | 29050.857  | STRN3      |
| chr1  | 145453909 | 145457963 | 1 | 4055  | 27453.688  | POLR3GL    |
| chr10 | 127502416 | 127514189 | 3 | 8569  | 27736.0107 | UROS       |
| chr6  | 150588102 | 150598696 | 3 | 9502  | 28933.2734 | IYD        |

---

---

|       |           |           |   |       |            |           |
|-------|-----------|-----------|---|-------|------------|-----------|
| chr6  | 24717617  | 24722656  | 1 | 5040  | 27551.2364 | C6orf62   |
| chr9  | 35726306  | 35733624  | 1 | 7319  | 27237.596  | CREB3     |
| chr22 | 20101674  | 20108581  | 1 | 6908  | 29204.1774 | RANBP1    |
| chr17 | 56082226  | 56085945  | 1 | 3720  | 27008.8656 | SRSF1     |
| chr11 | 205925    | 226348    | 6 | 11656 | 28555.4386 | RIC8A     |
| chr11 | 76409211  | 76415762  | 1 | 6552  | 27681.2505 | GUCY2E    |
| chr19 | 41368422  | 41382258  | 2 | 5846  | 28273.866  | CYP2A7    |
| chr4  | 79685093  | 79707870  | 5 | 11833 | 30279.7438 | BMP2K     |
| chr4  | 103740617 | 103750972 | 2 | 7795  | 27655.0985 | UBE2D3    |
| chr1  | 92170306  | 92200362  | 6 | 14488 | 30587.9912 | HSP90B3P  |
| chr3  | 38027186  | 38040556  | 3 | 11100 | 28476.763  | VILL      |
| chr12 | 104679378 | 104683833 | 1 | 4456  | 27024.921  | TXNRD1    |
| chr6  | 44188789  | 44217674  | 4 | 11111 | 30548.776  | HSP90AB1  |
| chr19 | 49375092  | 49379804  | 1 | 4713  | 27130.7536 | PPP1R15A  |
| chr6  | 36390312  | 36412820  | 3 | 8526  | 29415.7052 | KCTD20    |
| chr2  | 219258441 | 219272560 | 3 | 9864  | 27180.4869 | CTDSP1    |
| chr8  | 28742146  | 28751638  | 2 | 9280  | 27378.7248 | INTS9     |
| chr22 | 20860761  | 20878940  | 2 | 6460  | 33094.8695 | MED15     |
| chr15 | 96860252  | 96881030  | 3 | 12432 | 28357.8144 | NR2F2     |
| chr18 | 2569240   | 2573118   | 1 | 3879  | 26842.3526 | METTL4    |
| chr11 | 118781146 | 118800086 | 6 | 10984 | 28146.734  | BCL9L     |
| chr6  | 26155225  | 26174414  | 2 | 9910  | 29153.8477 | HIST1H2BD |
| chr3  | 10017336  | 10021926  | 1 | 4591  | 26704.161  | TMEM111   |
| chr1  | 150334446 | 150340004 | 1 | 5559  | 26507.2136 | RPRD2     |
| chr4  | 139156304 | 139165535 | 2 | 8537  | 27034.8297 | SLC7A11   |
| chr9  | 101819462 | 101840137 | 3 | 9330  | 28727.9125 | TGFBR1    |
| chr17 | 30672468  | 30683282  | 3 | 6134  | 26918.2088 | ZNF207    |
| chr9  | 94658476  | 94670959  | 1 | 12484 | 27915.7329 | ROR2      |
| chr16 | 50278721  | 50309146  | 6 | 12894 | 29223.2125 | ADCY7     |
| chr9  | 128000271 | 128009186 | 2 | 7788  | 26929.5405 | HSPA5     |
| chr8  | 142401191 | 142429731 | 4 | 11968 | 27869.31   | PTP4A3    |
| chr7  | 32918730  | 32946615  | 3 | 9735  | 28975.3035 | KBTBD2    |
| chr6  | 158231784 | 158263613 | 5 | 12138 | 31322.9189 | SNX9      |
| chr11 | 73489452  | 73500952  | 3 | 8158  | 26982.45   | MRPL48    |
| chr6  | 4010952   | 4024106   | 2 | 7585  | 27706.2702 | PRPF4B    |
| chr16 | 81026546  | 81042576  | 2 | 4561  | 27754.342  | CENPN     |
| chr9  | 135853843 | 135880709 | 7 | 15818 | 28996.4738 | GFI1B     |
| chr1  | 249119116 | 249124135 | 1 | 5020  | 25891.0134 | MIR3124   |
| chr9  | 111860385 | 111906967 | 8 | 17848 | 31279.813  | C9orf5    |
| chr2  | 10259292  | 10265593  | 2 | 6095  | 26035.1019 | RRM2      |
| chr7  | 129073229 | 129080791 | 2 | 7538  | 27199.0016 | FAM40B    |
| chr12 | 120102317 | 120111638 | 2 | 8523  | 26551.8006 | PRKAB1    |
| chr3  | 167426967 | 167454692 | 2 | 16524 | 28728.645  | PDCD10    |
| chr19 | 19168303  | 19176636  | 2 | 8284  | 26222.2844 | SLC25A42  |

---

---

|       |           |           |   |       |            |              |
|-------|-----------|-----------|---|-------|------------|--------------|
| chr19 | 18524777  | 18531545  | 1 | 6769  | 25798.2624 | SSBP4        |
| chr2  | 240178689 | 240217940 | 7 | 12840 | 27346.1717 | MIR4269      |
| chr17 | 43123995  | 43151707  | 3 | 8704  | 27193.7856 | DCAKD        |
| chr6  | 13272024  | 13276872  | 1 | 4849  | 26151.5664 | TBC1D7       |
| chr15 | 35836788  | 35850716  | 2 | 7339  | 27048.176  | ATPBD4       |
| chr17 | 2294614   | 2306255   | 2 | 10620 | 25797.6201 | MNT          |
| chr6  | 15889271  | 15909473  | 5 | 11169 | 28153.5072 | MYLIP        |
| chr20 | 17943613  | 17952688  | 1 | 9076  | 25769.37   | SNX5         |
| chr6  | 143484370 | 143491776 | 2 | 7405  | 26257.973  | AIG1         |
| chr7  | 139042725 | 139046818 | 1 | 4094  | 25790.4023 | LUC7L2       |
| chr11 | 69061015  | 69070306  | 2 | 9123  | 26154.165  | MYEOV        |
| chr17 | 8041399   | 8078510   | 7 | 16101 | 27072.4745 | PER1         |
| chr1  | 28968272  | 28971690  | 1 | 3419  | 25568.349  | TAF12        |
| chr19 | 5716957   | 5721155   | 1 | 4199  | 25371.0328 | LONP1        |
| chr7  | 30633220  | 30636928  | 1 | 3709  | 25106.1264 | GARS         |
| chr1  | 179849358 | 179853176 | 1 | 3819  | 25614.5802 | TOR1AIP1     |
| chr22 | 19158023  | 19167674  | 1 | 9652  | 28523.5305 | SLC25A1      |
| chr3  | 14264153  | 14277966  | 2 | 7816  | 27145.3076 | LSM3         |
| chr3  | 37032107  | 37036290  | 1 | 4184  | 25439.7511 | EPM2AIP1     |
| chr17 | 46652320  | 46660582  | 1 | 8263  | 25628.724  | HOXB4        |
| chr22 | 30815995  | 30841386  | 3 | 8591  | 26289.8414 | MTFP1        |
| chr12 | 12867184  | 12888141  | 3 | 12463 | 25940.5746 | APOLD1       |
| chr22 | 38786910  | 38797619  | 2 | 10355 | 26536.902  | LOC400927    |
| chr22 | 21909916  | 21938168  | 4 | 10010 | 33190.4496 | UBE2L3       |
| chr22 | 20007297  | 20015270  | 2 | 7643  | 28021.1085 | C22orf25     |
| chr17 | 61847157  | 61854067  | 2 | 6749  | 25699.672  | CCDC47       |
| chr4  | 111113738 | 111121047 | 2 | 7298  | 25512.0645 | ELOVL6       |
| chr2  | 232570486 | 232581112 | 4 | 7430  | 25124.1144 | MIR1244-1    |
| chr5  | 179238231 | 179249606 | 2 | 6365  | 25315.0625 | SQSTM1       |
| chr11 | 72483936  | 72499635  | 3 | 6314  | 25956.7266 | STARD10      |
| chr3  | 142716083 | 142722343 | 2 | 5379  | 25115.746  | LOC100289361 |
| chr6  | 26052421  | 26066842  | 2 | 6854  | 26752.3971 | HIST1H1C     |
| chr4  | 175202249 | 175208437 | 2 | 5936  | 25029.8412 | FBXO8        |
| chr1  | 2107015   | 2144853   | 7 | 13773 | 28930.9348 | C1orf86      |
| chr17 | 33913519  | 33918193  | 1 | 4675  | 24829.2228 | AP2B1        |
| chr19 | 39888221  | 39904113  | 4 | 12639 | 25843.5704 | ZFP36        |
| chr1  | 45239910  | 45244244  | 1 | 4335  | 24754.5078 | SNORD46      |
| chr10 | 97872137  | 97891997  | 3 | 7686  | 25680.966  | ZNF518A      |
| chr19 | 14466464  | 14496818  | 9 | 12216 | 27175.9362 | CD97         |
| chr11 | 57191100  | 57200738  | 2 | 6078  | 25425.044  | SLC43A3      |
| chr22 | 19416874  | 19421500  | 1 | 4627  | 25876.4562 | HIRA         |
| chr20 | 34327067  | 34332976  | 2 | 5693  | 24918.8439 | RBM39        |
| chr19 | 1267913   | 1277014   | 1 | 9102  | 25375.4082 | C19orf23     |
| chr4  | 6910084   | 6920583   | 5 | 9189  | 25351.9353 | TBC1D14      |

---

---

|       |           |           |   |       |            |              |
|-------|-----------|-----------|---|-------|------------|--------------|
| chr10 | 33233125  | 33270295  | 7 | 14391 | 27925.821  | ITGB1        |
| chr21 | 27105122  | 27109156  | 1 | 4035  | 24381.496  | GABPA        |
| chr5  | 121434392 | 121463831 | 3 | 8038  | 27852.2379 | ZNF474       |
| chr17 | 31209008  | 31242899  | 9 | 12623 | 27868.5693 | MYO1D        |
| chr16 | 29656647  | 29692734  | 6 | 12874 | 26935.3368 | SPN          |
| chr9  | 127621986 | 127633994 | 2 | 9479  | 25165.1656 | ARPC5L       |
| chr3  | 155569356 | 155591271 | 3 | 9353  | 26177.4675 | GMPS         |
| chr19 | 39326979  | 39344042  | 3 | 8656  | 25589.3811 | HNRNPL       |
| chr12 | 53748794  | 53777336  | 5 | 10147 | 26164.4514 | SP1          |
| chr2  | 169652479 | 169661583 | 2 | 7754  | 26092.9744 | NOSTRIN      |
| chr1  | 173832703 | 173841067 | 1 | 8365  | 25772.8296 | SNORD74      |
| chr2  | 111432065 | 111453931 | 4 | 11235 | 26676.52   | BUB1         |
| chr7  | 1496289   | 1503275   | 2 | 6694  | 24543.2152 | MICALL2      |
| chr4  | 74919625  | 74931570  | 2 | 7024  | 25706.8345 | PPBPL2       |
| chr2  | 27224549  | 27244135  | 6 | 13109 | 26887.6608 | TMEM214      |
| chr15 | 58621899  | 58650395  | 3 | 6090  | 26994.2608 | LIPC         |
| chr1  | 111414874 | 111434527 | 4 | 10070 | 27571.1937 | CD53         |
| chr21 | 45430997  | 45450311  | 6 | 13626 | 27404.6346 | TRAPPC10     |
| chr8  | 128957389 | 128992987 | 8 | 17455 | 28659.9498 | MIR1205      |
| chr17 | 57905125  | 57921201  | 3 | 11064 | 25237.7124 | MIR21        |
| chr11 | 807841    | 813961    | 2 | 5892  | 24484.284  | SNORA52      |
| chrX  | 123092471 | 123098134 | 2 | 5601  | 24020.1808 | STAG2        |
| chr2  | 153572464 | 153577125 | 1 | 4662  | 24348.1318 | ARL6IP6      |
| chr1  | 47644301  | 47660638  | 3 | 9261  | 26805.7496 | PDZK1IP1     |
| chr20 | 57580202  | 57598534  | 6 | 14813 | 25831.6212 | TUBB1        |
| chr14 | 69246621  | 69264923  | 2 | 9218  | 25394.025  | ZFP36L1      |
| chr6  | 30647506  | 30656699  | 2 | 8652  | 25104.2444 | KIAA1949     |
| chr8  | 59553933  | 59573899  | 6 | 11352 | 26047.6436 | NSMAF        |
| chr9  | 86592981  | 86607584  | 3 | 7834  | 24243.9006 | RMI1         |
| chr1  | 89996065  | 90017134  | 7 | 13434 | 26481.6261 | LRRC8B       |
| chr14 | 35014770  | 35031765  | 3 | 5436  | 25116.9105 | EAPP         |
| chr1  | 43284287  | 43297248  | 3 | 7057  | 25967.3635 | ERMAP        |
| chr4  | 79611885  | 79656491  | 6 | 13699 | 28574.6036 | BMP2K        |
| chr1  | 108960835 | 108966401 | 1 | 5567  | 25796.1836 | NBPF6        |
| chr1  | 235092350 | 235120696 | 6 | 12130 | 29051.8154 | SNORA14B     |
| chr1  | 161358981 | 161377948 | 3 | 5700  | 25461.3008 | C1orf192     |
| chr3  | 17770851  | 17785338  | 3 | 8036  | 25985.3319 | TBC1D5       |
| chr6  | 16257721  | 16278547  | 4 | 8784  | 26213.6862 | GMPR         |
| chr14 | 91263707  | 91274101  | 4 | 8718  | 24160.853  | TTC7B        |
| chr19 | 788472    | 801637    | 3 | 10051 | 24697.54   | PTBP1        |
| chr4  | 40238973  | 40242212  | 1 | 3240  | 23680.9768 | RHOH         |
| chr19 | 15938540  | 15950458  | 5 | 10275 | 24164.9368 | UCA1         |
| chr3  | 193554268 | 193573127 | 4 | 9338  | 25838.7159 | LOC100128023 |
| chr12 | 108953184 | 108959072 | 1 | 5889  | 24075.4432 | ISCU         |

---

---

|       |           |           |   |       |            |              |
|-------|-----------|-----------|---|-------|------------|--------------|
| chr1  | 108813220 | 108817898 | 1 | 4679  | 25193.8368 | NBPF4        |
| chr5  | 10351108  | 10358779  | 2 | 6678  | 24719.0304 | 43530        |
| chr5  | 130969281 | 130973104 | 1 | 3824  | 23788.2352 | RAPGEF6      |
| chr9  | 113016833 | 113020972 | 1 | 4140  | 23689.5665 | TXN          |
| chr17 | 41320581  | 41324943  | 1 | 4363  | 24196.4502 | NBR1         |
| chr1  | 12661366  | 12680307  | 3 | 9481  | 26379.1307 | DHRS3        |
| chr6  | 28888066  | 28893641  | 1 | 5576  | 24318.15   | TRIM27       |
| chr1  | 212203857 | 212212019 | 2 | 6090  | 24660.6668 | INTS7        |
| chr6  | 109700805 | 109705303 | 1 | 4499  | 23920.8138 | CD164        |
| chr5  | 33439238  | 33443654  | 1 | 4417  | 24101.2032 | TARS         |
| chr10 | 30830941  | 30843788  | 2 | 4925  | 24337.3568 | LYZL2        |
| chr1  | 149830207 | 149834871 | 1 | 4665  | 24702.876  | HIST2H2BC    |
| chr1  | 149802074 | 149806539 | 1 | 4466  | 24628.4935 | HIST2H4B     |
| chr11 | 113533494 | 113562388 | 5 | 10156 | 26227.0838 | TMPRSS5      |
| chr17 | 44260582  | 44273113  | 2 | 8035  | 26285.0256 | KIAA1267     |
| chr1  | 150944108 | 150952685 | 1 | 8578  | 24048.1926 | LASS2        |
| chr1  | 36600318  | 36628755  | 4 | 12883 | 27569.6715 | TRAPPC3      |
| chr20 | 22382545  | 22395750  | 3 | 7678  | 24467.5445 | LOC284788    |
| chr19 | 52299063  | 52333444  | 6 | 11270 | 26679.656  | FPR3         |
| chr19 | 48746573  | 48763282  | 3 | 9037  | 25825.4304 | CARD8        |
| chr11 | 62309955  | 62342883  | 6 | 12738 | 26694.7296 | AHNAK        |
| chr10 | 17684838  | 17726558  | 5 | 9028  | 28498.932  | STAM         |
| chrX  | 41190190  | 41195597  | 1 | 5408  | 23257.1291 | DDX3X        |
| chr15 | 91191252  | 91210895  | 5 | 9030  | 25009.4676 | BLM          |
| chr14 | 81882416  | 81903806  | 5 | 14524 | 24782.454  | STON2        |
| chr14 | 23747210  | 23772797  | 5 | 12105 | 25760.9916 | HOMEZ        |
| chr2  | 178075377 | 178080548 | 1 | 5172  | 23768.5015 | HNRNPA3      |
| chr3  | 176911376 | 176917553 | 1 | 6178  | 23357.0901 | TBL1XR1      |
| chr1  | 235489466 | 235495680 | 1 | 6215  | 23852.439  | GGPS1        |
| chr3  | 101347922 | 101362766 | 3 | 13844 | 23558.9124 | LOC100009676 |
| chr8  | 144359527 | 144377323 | 4 | 11606 | 24958.89   | ZNF696       |
| chr3  | 44480493  | 44484772  | 2 | 4131  | 23555.0392 | ZNF445       |
| chr16 | 23831319  | 23852363  | 4 | 13199 | 25578.982  | PRKCB        |
| chr19 | 55714768  | 55729567  | 3 | 6583  | 24169.7268 | PTPRH        |
| chr10 | 93367072  | 93391040  | 4 | 6177  | 24416.2016 | LOC100188947 |
| chr1  | 193080510 | 193092671 | 3 | 9835  | 24697.7749 | CDC73        |
| chr6  | 20403921  | 20426309  | 6 | 14638 | 26599.1828 | E2F3         |
| chr1  | 117366705 | 117371118 | 1 | 4414  | 23414.9367 | CD2          |
| chr20 | 44598649  | 44612647  | 2 | 4652  | 24181.545  | ZNF335       |
| chr8  | 102137963 | 102172312 | 5 | 11038 | 26764.7408 | ZNF706       |
| chr6  | 27774034  | 27781531  | 1 | 7498  | 24147.837  | HIST1H3H     |
| chr15 | 64384233  | 64389440  | 1 | 5208  | 23224.7821 | FAM96A       |
| chr9  | 119224416 | 119234977 | 3 | 8679  | 24075.9117 | LOC100128505 |
| chr16 | 87885277  | 87905547  | 4 | 7734  | 23547.659  | SLC7A5       |

---

---

|       |           |           |   |       |            |           |
|-------|-----------|-----------|---|-------|------------|-----------|
| chr11 | 65657251  | 65680013  | 8 | 11643 | 24803.7514 | FOSL1     |
| chr7  | 64457832  | 64467939  | 2 | 8542  | 23586.7059 | ERV3      |
| chr3  | 185528804 | 185544411 | 3 | 11172 | 24080.0403 | IGF2BP2   |
| chr8  | 101961079 | 101966971 | 1 | 5893  | 22922.826  | YWHAZ     |
| chr7  | 138775358 | 138809977 | 5 | 13791 | 28934.5602 | ZC3HAV1   |
| chr16 | 70321177  | 70325383  | 1 | 4207  | 22401.9972 | AARS      |
| chr6  | 27112356  | 27116527  | 1 | 4172  | 23082.314  | HIST1H2BK |
| chr17 | 80817056  | 80846034  | 5 | 10080 | 25265.9182 | ZNF750    |
| chr7  | 12423615  | 12444898  | 2 | 10013 | 24907.4949 | VWDE      |
| chr3  | 196225688 | 196256418 | 6 | 10825 | 24842.132  | C3orf43   |
| chr2  | 55836218  | 55858001  | 4 | 5934  | 24335.9676 | SMEK2     |
| chr12 | 54691340  | 54696956  | 1 | 5617  | 22813.8768 | NFE2      |
| chr9  | 4848139   | 4866973   | 5 | 14524 | 24378.7296 | MIR101-2  |
| chr14 | 70151153  | 70170320  | 4 | 9570  | 23598.4104 | SRSF5     |
| chr6  | 41038316  | 41043411  | 1 | 5096  | 23082.8975 | NFYA      |
| chr1  | 228673777 | 228679095 | 1 | 5319  | 22731.2592 | RNF187    |
| chr7  | 106296190 | 106302423 | 1 | 6234  | 23772.662  | FLJ36031  |
| chr17 | 40667672  | 40707634  | 8 | 14163 | 26906.4146 | NAGLU     |
| chr3  | 45311067  | 45316497  | 2 | 4497  | 23073.699  | TMEM158   |
| chr1  | 243415619 | 243433588 | 2 | 8059  | 24764.8758 | SDCCAG8   |
| chr1  | 180572135 | 180582357 | 2 | 5058  | 24229.2066 | XPR1      |
| chr11 | 34065929  | 34075965  | 2 | 6725  | 23347.7504 | CAPRIN1   |
| chr1  | 202771890 | 202780903 | 2 | 8566  | 23658.2237 | KDM5B     |
| chr12 | 56545023  | 56554678  | 2 | 8736  | 22983.7275 | MYL6      |
| chr3  | 31563202  | 31575828  | 2 | 5328  | 23608.0948 | STT3B     |
| chr8  | 30600755  | 30603818  | 1 | 3064  | 22130.175  | UBXN8     |
| chr7  | 5588651   | 5615306   | 7 | 11809 | 24266.712  | FSCN1     |
| chr2  | 26980126  | 26995721  | 4 | 9772  | 23564.045  | C2orf18   |
| chr15 | 89611392  | 89636252  | 6 | 14238 | 25046.45   | ABHD2     |
| chr8  | 144988635 | 145031500 | 6 | 13694 | 24167.287  | PLEC      |
| chr1  | 116947556 | 116977247 | 5 | 12360 | 27562.1553 | ATP1A1OS  |
| chr16 | 28832962  | 28837858  | 1 | 4897  | 22282.1856 | ATXN2L    |
| chr12 | 57911766  | 57914528  | 1 | 2763  | 22129.4202 | DDIT3     |
| chr3  | 197679818 | 197689623 | 2 | 7302  | 22858.3965 | IQCG      |
| chr11 | 64035190  | 64041884  | 2 | 5965  | 22201.9898 | GPR137    |
| chr12 | 116989163 | 117000221 | 3 | 7114  | 22874.5788 | MAP1LC3B2 |
| chr17 | 61496971  | 61525725  | 5 | 9599  | 24659.4304 | CYB561    |
| chr7  | 128466496 | 128473938 | 2 | 7280  | 23106.6658 | FLNC      |
| chr2  | 85640609  | 85666386  | 5 | 11196 | 24343.7988 | SH2D6     |
| chr21 | 47739826  | 47746505  | 1 | 6680  | 22396.0228 | C21orf58  |
| chr2  | 198791105 | 198800197 | 1 | 9093  | 22635.4432 | PLCL1     |
| chr16 | 89552607  | 89575775  | 4 | 9984  | 23798.1696 | ANKRD11   |
| chr1  | 100811715 | 100831876 | 4 | 13204 | 24273.844  | CDC14A    |
| chr1  | 1675329   | 1679079   | 1 | 3751  | 22453.5    | SLC35E2   |

---

---

|       |           |           |   |       |            |              |
|-------|-----------|-----------|---|-------|------------|--------------|
| chr5  | 179124074 | 179128676 | 1 | 4603  | 22056.9258 | CANX         |
| chr22 | 19708733  | 19713532  | 1 | 4800  | 22997.7678 | GP1BB        |
| chr12 | 56519719  | 56524932  | 1 | 5214  | 22287.1389 | ESYT1        |
| chr3  | 151984013 | 151991968 | 1 | 7956  | 22758.4595 | LOC401093    |
| chr1  | 1617573   | 1625443   | 2 | 4037  | 22911.931  | SLC35E2B     |
| chr1  | 245131864 | 245136008 | 1 | 4145  | 22137.6624 | EFCAB2       |
| chr2  | 70349785  | 70354071  | 1 | 4287  | 21946.8916 | LOC100133985 |
| chr2  | 25013009  | 25042080  | 5 | 9037  | 24454.5252 | CENPO        |
| chr9  | 224282    | 275398    | 7 | 14038 | 25271.7504 | DOCK8        |
| chr4  | 6731913   | 6736950   | 1 | 5038  | 22052.4897 | CNO          |
| chr17 | 57856148  | 57866044  | 2 | 6460  | 22706.372  | MIR21        |
| chrX  | 100638498 | 100648000 | 3 | 8310  | 21933.4666 | BTK          |
| chr12 | 48166379  | 48172121  | 1 | 5743  | 21948.2208 | SLC48A1      |
| chr1  | 21995334  | 22016562  | 5 | 10366 | 25061.7768 | RAP1GAP      |
| chr1  | 55644511  | 55683922  | 8 | 14210 | 26961.0651 | USP24        |
| chr2  | 55272728  | 55280464  | 2 | 7722  | 22702.8392 | RTN4         |
| chr2  | 55450381  | 55463703  | 4 | 7834  | 22813.925  | RPS27A       |
| chr11 | 36111674  | 36137434  | 6 | 12421 | 24090.752  | LDLRAD3      |
| chr5  | 139065657 | 139090723 | 4 | 12323 | 24166.1306 | CXXC5        |
| chr12 | 51410886  | 51427728  | 3 | 10479 | 23183.013  | SLC11A2      |
| chr7  | 5460610   | 5469989   | 3 | 9089  | 22069.7249 | TNRC18       |
| chr5  | 40831479  | 40836892  | 1 | 5414  | 22186.8044 | RPL37        |
| chr7  | 150752822 | 150760921 | 1 | 8100  | 22979.2927 | SLC4A2       |
| chr12 | 131704992 | 131727745 | 5 | 9334  | 24065.8481 | LOC116437    |
| chr10 | 25184737  | 25219550  | 6 | 11839 | 25016.6218 | PRTFDC1      |
| chr2  | 86215178  | 86230702  | 3 | 11255 | 23413.2968 | LOC90784     |
| chr5  | 163762933 | 163788438 | 4 | 9723  | 24229.75   | MAT2B        |
| chr16 | 30074640  | 30082329  | 2 | 7654  | 21922.8768 | ALDOA        |
| chrX  | 135960827 | 135993696 | 8 | 12630 | 22929.4144 | RBMX         |
| chr2  | 168795308 | 168820047 | 4 | 11464 | 24894.8557 | B3GALT1      |
| chr9  | 3526014   | 3529579   | 1 | 3566  | 21104.4435 | RFX3         |
| chr1  | 1582432   | 1594930   | 3 | 7414  | 24221.124  | MMP23A       |
| chr2  | 220365720 | 220392333 | 8 | 15800 | 22759.4376 | ACCN4        |
| chr19 | 50264374  | 50280199  | 5 | 9234  | 22686.72   | AP2A1        |
| chr15 | 55688425  | 55701291  | 2 | 10879 | 22611.995  | CCPG1        |
| chr19 | 13042300  | 13052209  | 2 | 7422  | 22243.7232 | CALR         |
| chr15 | 52297676  | 52315844  | 6 | 10871 | 22969.8024 | MAPK6        |
| chr6  | 135626980 | 135648948 | 3 | 10856 | 24579.9952 | MYB          |
| chr17 | 49198364  | 49211284  | 3 | 3860  | 22187.516  | SPAG9        |
| chr8  | 102204769 | 102220195 | 4 | 10811 | 22953.888  | ZNF706       |
| chr19 | 59064944  | 59072017  | 1 | 7074  | 21659.6479 | UBE2M        |
| chrX  | 151304762 | 151347300 | 7 | 11962 | 24068.0004 | MAGEA10      |
| chr10 | 70714601  | 70718078  | 1 | 3478  | 21260.4642 | DDX21        |
| chr4  | 127650795 | 127665230 | 5 | 13112 | 22466.634  | INTU         |

---



|       |           |           |   |       |            |              |
|-------|-----------|-----------|---|-------|------------|--------------|
| chr1  | 249150061 | 249154682 | 1 | 4622  | 21493.1952 | ZNF692       |
| chr1  | 165796565 | 165812401 | 5 | 7509  | 23529.1288 | UCK2         |
| chr5  | 43037398  | 43043708  | 2 | 6176  | 21991.612  | C5orf39      |
| chr2  | 114643946 | 114653391 | 3 | 8116  | 22107.9115 | ACTR3        |
| chr11 | 122929447 | 122935348 | 2 | 5398  | 21454.8558 | HSPA8        |
| chrX  | 38660095  | 38677022  | 2 | 8152  | 22010.1781 | MID1IP1      |
| chr10 | 51561689  | 51578440  | 3 | 10243 | 23774.6943 | NCOA4        |
| chr6  | 27437440  | 27448040  | 2 | 7050  | 22805.9    | ZNF184       |
| chr10 | 43139618  | 43152681  | 3 | 8033  | 23309.6172 | ZNF33B       |
| chr1  | 152006119 | 152021615 | 2 | 6069  | 22610.2136 | S100A11      |
| chr14 | 100838444 | 100855228 | 2 | 5896  | 21609.4    | WDR25        |
| chr1  | 12585349  | 12613663  | 6 | 11584 | 25094.6982 | SNORA59A     |
| chr10 | 70090366  | 70093975  | 1 | 3610  | 21282.9948 | HNRNPH3      |
| chr6  | 31788435  | 31791423  | 1 | 2989  | 21498.0624 | HSPA1B       |
| chr6  | 170858700 | 170865071 | 2 | 5848  | 21930.8933 | PSMB1        |
| chr15 | 55527695  | 55543727  | 2 | 6673  | 22847.2032 | RAB27A       |
| chr1  | 15868325  | 15872314  | 1 | 3990  | 21445.2629 | DNAJC16      |
| chr19 | 38801968  | 38813155  | 4 | 8825  | 21586.4352 | YIF1B        |
| chr3  | 186647474 | 186674781 | 6 | 14293 | 23937.3162 | ST6GAL1      |
| chr1  | 29505177  | 29510205  | 1 | 5029  | 21346.8768 | SRSF4        |
| chr6  | 31792875  | 31800393  | 1 | 7519  | 22908.8496 | HSPA1B       |
| chr15 | 93420513  | 93428912  | 2 | 8369  | 21742.4913 | LOC100507217 |
| chr5  | 137672179 | 137675837 | 1 | 3659  | 20966.9244 | FAM53C       |
| chr1  | 26601913  | 26616267  | 2 | 13302 | 23237.6906 | SH3BGRL3     |
| chr3  | 171515536 | 171532508 | 3 | 10720 | 23025.9124 | PLD1         |
| chr10 | 21812283  | 21818628  | 1 | 6346  | 21382.65   | C10orf140    |
| chr3  | 39188064  | 39220241  | 5 | 12772 | 24361.2067 | CSRNP1       |
| chr2  | 26284086  | 26310003  | 6 | 11197 | 23641.4874 | RAB10        |
| chr12 | 28342266  | 28345527  | 1 | 3262  | 20857.6821 | CCDC91       |
| chr10 | 76967151  | 76972405  | 2 | 4741  | 21210.398  | VDAC2        |
| chr6  | 139763143 | 139771811 | 1 | 8669  | 22177.078  | LOC645434    |
| chr6  | 26214419  | 26219653  | 1 | 5235  | 21228.5806 | HIST1H2AE    |
| chr1  | 26395733  | 26406277  | 2 | 3766  | 21908.3232 | TRIM63       |
| chr6  | 13978179  | 13993747  | 4 | 9313  | 23113.8096 | RNF182       |
| chr4  | 174252927 | 174258067 | 1 | 5141  | 21003.068  | HMGB2        |

**Supplementary Table 3** Pathway enrichment analysis.

| GO          | Description                      | -LogP value    |               |
|-------------|----------------------------------|----------------|---------------|
|             |                                  | Super-enhancer | Yellow module |
| GO:0030219  | Megakaryocyte differentiation    | -9.333276497   | -18.73113275  |
| R-HSA-56898 | Ub-specific processing proteases | -6.57488244    | -19.40729718  |
| 80          |                                  |                |               |
| R-HSA-10958 | Hemostasis                       | -7.975552982   | -6.257211463  |

---

|             |                                                      |              |              |  |
|-------------|------------------------------------------------------|--------------|--------------|--|
| 2           |                                                      |              |              |  |
| R-HSA-16401 | Cell Cycle                                           | -7.128956794 | -72.69283418 |  |
| 70          |                                                      |              |              |  |
| GO:0033044  | Regulation of chromosome organization                | -5.742909567 | -7.793615648 |  |
| R-HSA-44914 | Signaling by Interleukins                            | -5.692293323 | -4.023213426 |  |
| 7           |                                                      |              |              |  |
| GO:0034508  | Centromere complex assembly                          | -2.247093182 | -20.5181339  |  |
| hsa04110    | Cell cycle                                           | -3.99589127  | -13.92977409 |  |
| GO:0006281  | DNA repair                                           | 0            | -15.57087478 |  |
| R-HSA-68877 | Mitotic Prometaphase                                 | 0            | -18.09648047 |  |
| GO:0007051  | Spindle organization                                 | 0            | -10.03164282 |  |
| GO:0007059  | Chromosome segregation                               | 0            | -20.5366308  |  |
| M14         | PID AURORA B PATHWAY                                 | 0            | -9.749985902 |  |
| M46         | PID ATR PATHWAY                                      | 0            | -9.749985902 |  |
| GO:0002227  | Innate immune response in mucosa                     | 0            | -8.481736012 |  |
| GO:0008608  | Attachment of spindle microtubules to kinetochore    | 0            | -7.524258171 |  |
| GO:0035967  | Cellular response to topologically incorrect protein | -7.197470088 | 0            |  |
| R-HSA-17083 | Signaling by TGF-beta Receptor Complex               | -7.46973446  | 0            |  |
| 4           |                                                      |              |              |  |
| R-HSA-19999 | Membrane Trafficking                                 | -6.077936425 | 0            |  |
| 1           |                                                      |              |              |  |
| GO:1903827  | Regulation of cellular protein localization          | -7.278026488 | 0            |  |

---
